# Supplementary material for: Metal–organic frameworks as anchors for giant unilamellar vesicle immobilization
Source: Royal Society of Chemistry journal article supplement (doi:10.1039/d4tb02055c), 2025-01-01
Supplement: d4tb02055c1.pdf [file d4tb02055c1.pdf]

Supplementary Information for  
**Investigating Metal-Organic Frameworks Anchors for Giant Unilamellar  
Vesicle Immobilization**

Aroosha Faheem,<sup>a</sup> Mason C. Lawrence,<sup>a</sup> Gazi A. Bushra,<sup>a</sup> M.-Vicki Meli,<sup>b</sup> and Barry A. Blight\*  
<sup>a</sup> Department of Chemistry, University of New Brunswick, Fredericton, N.B. Canada  
<sup>b</sup> Department of Chemistry and Biochemistry, Mount Allison University, Sackville, N.B., Canada

|    |                                               |    |
|----|-----------------------------------------------|----|
| 1  |                                               |    |
| 2  | <b>Contents</b>                               |    |
| 3  | Chemical Reagents.....                        | 2  |
| 4  | GUV Lipid Composition.....                    | 2  |
| 5  | Electroformation Protocol.....                | 2  |
| 6  | GUV Imaging.....                              | 4  |
| 7  | Vesicle Diameter .....                        | 8  |
| 8  | GUV Immobilization and Viability Images ..... | 12 |
| 9  | MOF Synthesis Protocols .....                 | 16 |
| 10 | <i>MIL-53(Al)</i> .....                       | 16 |
| 11 | <i>MIL-100(Al)</i> .....                      | 17 |
| 12 | <i>MOF-177</i> .....                          | 18 |
| 13 | <i>CuBDC</i> .....                            | 19 |
| 14 | <i>HKUST-1</i> .....                          | 20 |
| 15 | <i>MIL-53(Fe)</i> .....                       | 22 |
| 16 | <i>UiO-66</i> .....                           | 23 |
| 17 | <i>MOF-808</i> .....                          | 24 |
| 18 | <i>CaBDC</i> .....                            | 25 |
| 19 | <i>MgMOF-74</i> .....                         | 26 |
| 20 | ICP-OES Analysis.....                         | 28 |
| 21 | Confocal Z-stacks .....                       | 29 |
| 22 | GUV@MOF SEM .....                             | 30 |
| 23 | Atomic Force Microscopy (AFM).....            | 33 |
| 24 | Supplementary Videos .....                    | 35 |
| 25 |                                               |    |
| 26 |                                               |    |

## Supplementary Information for **Investigating Metal-Organic Frameworks Anchors for Giant Unilamellar Vesicle Immobilization**

### 27 **Chemical Reagents**

28 All reagents were purchased from Sigma Aldrich, Fisher Scientific and Avanti Polar Lipids and  
29 used as received, unless otherwise stated.

### 30 **GUV Lipid Composition**

31 GUVs were synthesized using standard electroformation protocol as reported in our previous  
32 study.<sup>1</sup> The lipids 1-Palmitoyl-2-oleoyl-glycero-3-phosphocholine (POPC), 1-palmitoyl-2-oleoyl-  
33 sn-glycero-3-phospho-(1-rac-glycerol) (sodium salt) (POPG), 1,2-dioleoyl-sn-glycero-3-  
34 phosphocholine (DOPC), 1,2-dipalmitoyl-sn-glycero-3-phosphocholine (DPPC) and cholesterol  
35 were purchased from Avanti Polar Lipids (dissolved in chloroform to a concentration of 20 mg/mL  
36 stock solution). The fluorescent tag Topfluor® cholesterol was also purchased from Avanti Polar  
37 Lipids and was made up to 1 mg/mL in chloroform. Three different lipid mixtures were prepared  
38 a) POPC, POPG and cholesterol were mixed in a 4:1:1 molar ratio b) POPC and cholesterol were  
39 mixed in 7:3 molar ratio c) DOPC, DPPC and cholesterol were mixed in 1:1:20 mol% ratio. Each  
40 lipid mixture was made to an overall 2 mg/ml concentration and TopFluor® cholesterol 0.1 mol%  
41 of the concentration of cholesterol was added for imaging purpose.

### 42 **Electroformation Protocol**

43 The non-conductive sides of two ITO coated glass electrodes were marked with a circle of 13 mm  
44 diameter. An aliquot of 2  $\mu$ L for each lipid mixture was gently spread onto the electrically  
45 conductive sides of each of the ITO slide on the marked area using a microsyringe. The ITO slides  
46 were dried in a vacuum desiccator for at least 30 minutes to fully remove the organic solvent. The  
47 slides were loosely covered with aluminum foil to keep the samples in the dark. A 2 mm thick O-  
48 ring with a diameter of 14 mm was fixed with minimal amount of silicon grease onto one of the  
49 two slides. For each experiment, 160  $\mu$ L of electroformation buffer solution (200 mM sucrose and  
50 1 mM HEPES pH 7.4 in DI water) with desired MOF approx. 5 mg (a microspatula tip) was  
51 vortexed and filled into the chamber. The electroformation solution containing MOF should be left  
52 to settle for 5 minutes on ITO slides. The second ITO slide was then put together to form a closed  
53 chamber such that the conducting sides of the slides faces each other in NANION Vesicle Prep  
54 Pro.

## Supplementary Information for Investigating Metal-Organic Frameworks Anchors for Giant Unilamellar Vesicle Immobilization

55 Swelling of POPC:POPG:Chol (4:1:1) and POPC:Chol (7:3) lipid films was done by applying a  
56 10 Hz sinusoidal AC electric field at 35°C. The amplitude of the applied field was linearly  
57 increased from 0.1 V - 0.5 V (peak to peak) over 30 minutes. The voltage was then further increased  
58 over 15 minutes to 1.6 V and remained constant for 2 hours to grow the vesicles. Finally, the  
59 voltage was slowly lowered to 0 V in 5 minutes to peel the vesicles off from the electrodes. For  
60 the electroformation of DOPC:DPPC:Chol (1:1:20 mol%) vesicles, a 10 Hz sinusoidal AC electric  
61 field at 45°C was applied where the voltage was ramped from 0 V to 2V within first 25 minutes  
62 and remained constant at 2V for 2 hours, followed by decrease to 0 V in 5 minutes to end the  
63 protocol. The samples were shielded from external light during electroformation. Once  
64 electroformed, GUVs were diluted in resuspension buffer solution (200 mM glucose and 1 mM  
65 HEPES pH 7.4 in DI water) and transferred to an imaging well for phase contrast microscopy. The  
66 GUVs were handled using a plastic pipette with the end cut off to an opening of at least 5  
67 millimetres to prevent lysing of vesicles during the transfer processes.

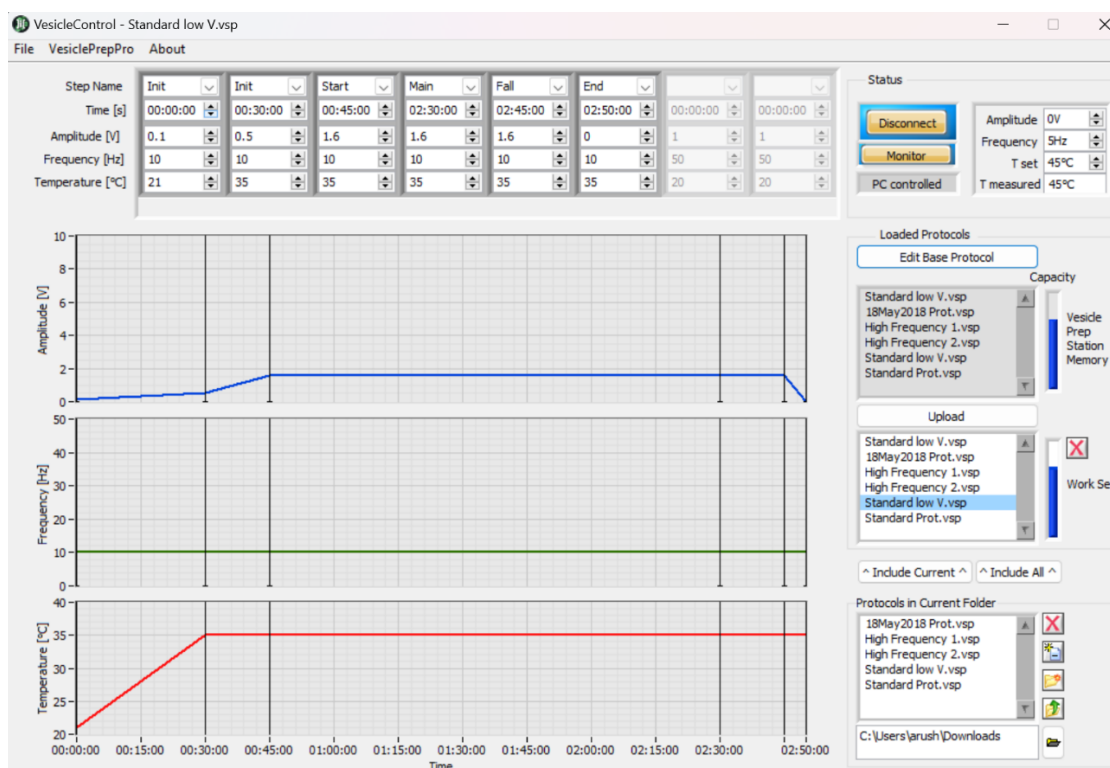

68  
69 **Figure S1.** Electroformation protocol parameters displayed on the Nanion Vesicle Prep Pro  
70 *VesicleControl* software for POPC:POPG:Chol and POPC:Chol lipid mixtures.

# Supplementary Information for Investigating Metal-Organic Frameworks Anchors for Giant Unilamellar Vesicle Immobilization

71

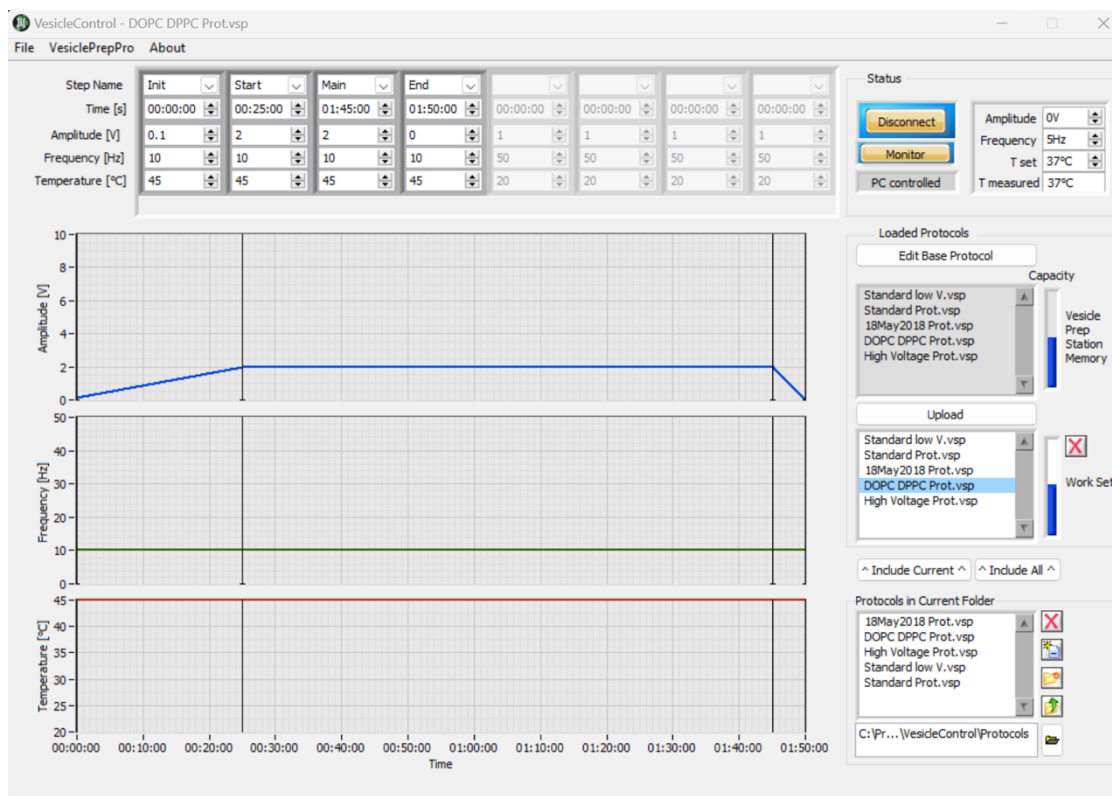

72

73 **Figure S2.** Electroformation protocol parameters displayed on the Nanion Vesicle Prep Pro  
74 *VesicleControl* software for DOPC:DPPC:Chol lipid mixture.

## 75 **GUV Imaging**

76 To assess the influence of various MOFs on GUV formation, we conducted experiments across  
77 three independent runs for each lipid mixture associated with each MOF. Following  
78 electroformation, the GUVs were suspended in 2 mL of resuspension buffer and subsequently  
79 divided into four imaging wells per experiment. Images of the anchored GUVs were captured from  
80 each well using Echo Discover Revolve Fluorescent microscope in the FITC channel immediately  
81 after they were formed. The micron-sized MOF particles have absorbed TopFluor Chol and hence  
82 fluoresce with the GUVs. To determine whether MOFs supported GUV formation, three  
83 representative images containing the maximum number of GUVs were selected for each MOF, and  
84 the GUVs were counted. This quantification was then plotted to provide a comparative visual  
85 representation of GUV yields across the different MOFs. To address the anchoring of GUVs by

## Supplementary Information for Investigating Metal-Organic Frameworks Anchors for Giant Unilamellar Vesicle Immobilization

86 respective MOFs, a small amount (200  $\mu\text{L}$ ) of the GUV suspension was dispensed on a glass slide,  
87 and the vesicles were observed for 5 minutes. The flow of solution made unbound GUVs move  
88 while the ones anchored by MOFs remained stationary or attached. (see supplementary videos).

89

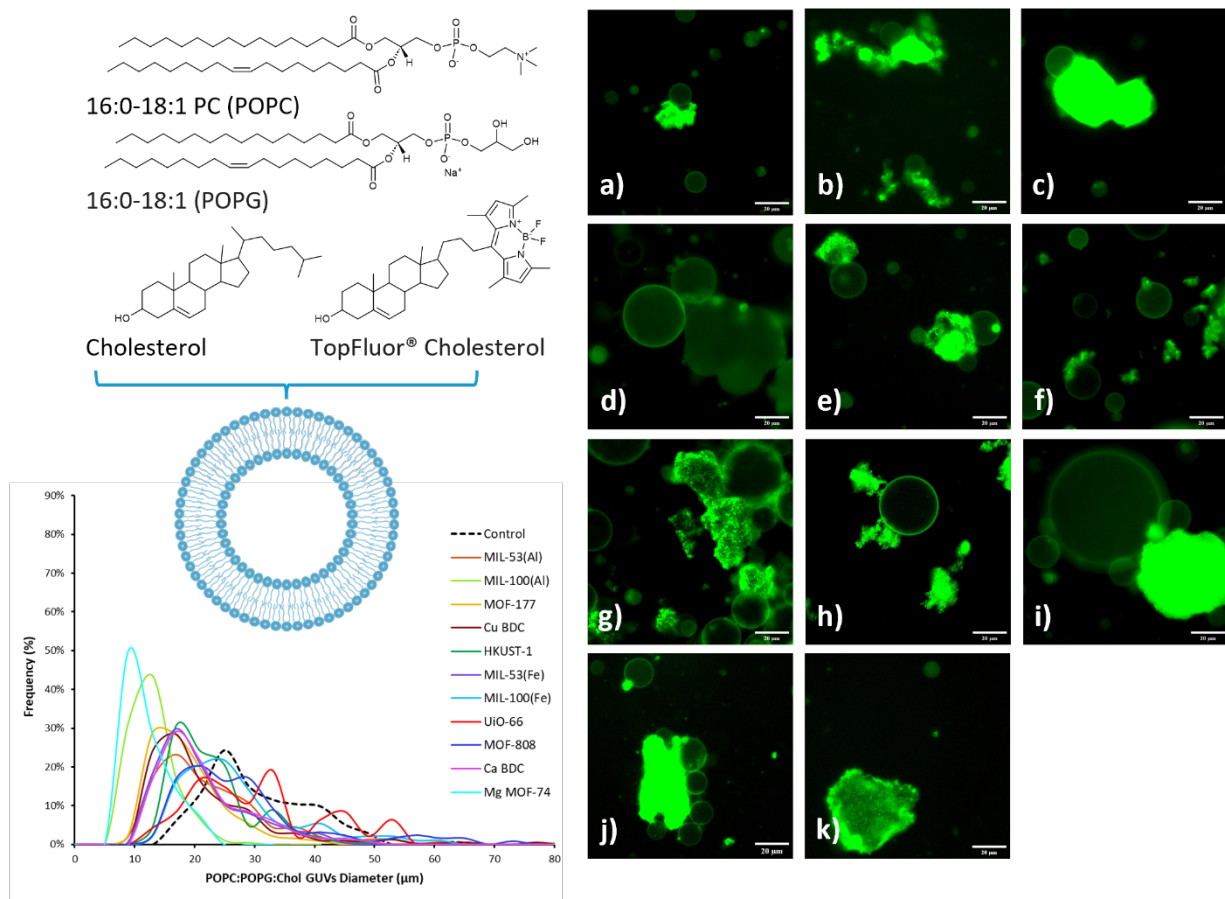

90

91 **Figure S3.** Fluorescence images of POPC:POPG:Chol (4:1:1) GUVs immobilized by MOF  
92 particles **a)** GUV/MIL-53(Al)/GUV **b)** GUV/MIL-100(Al) **c)** GUV/MOF-177 **d)**  
93 GUV/GUV/CuBDC **e)** GUVs/HKUST-1 **f)** GUVs/MIL-53(Fe) **g)** GUVs/MIL-100(Fe) **h)** UiO-  
94 66/GUV/UiO-66 **i)** GUVs/MOF-808 **j)** GUVs/CaBDC **k)** MgMOF-74. Scale bars represent 20  
95  $\mu\text{m}$ .

96

97

Supplementary Information for  
**Investigating Metal-Organic Frameworks Anchors for Giant Unilamellar  
 Vesicle Immobilization**

98

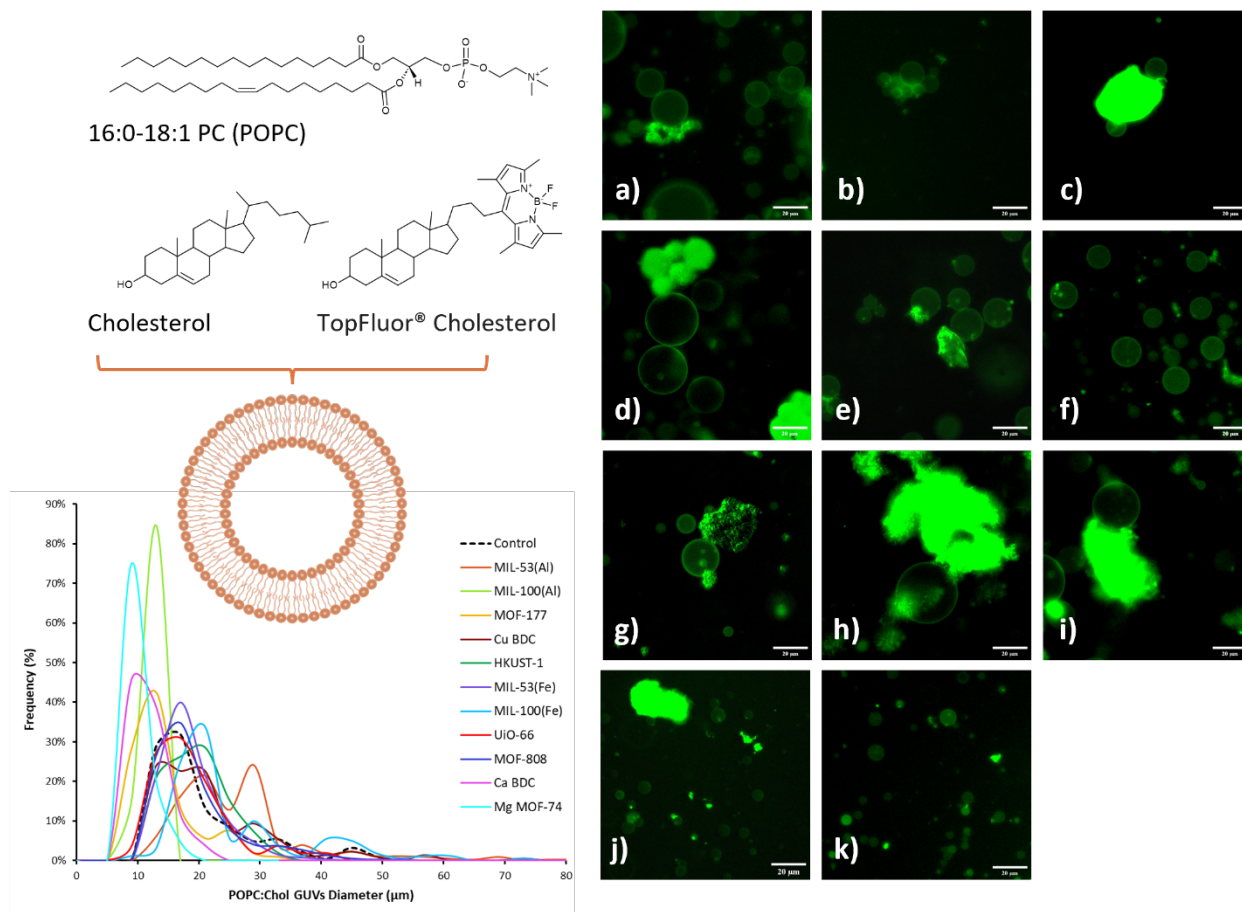

99

100 **Figure S4.** Fluorescence images of POPC:Chol (7:3) GUVs immobilized by MOF particles a)  
 101 GUV/GUV/MIL-53(Al) b) GUVs in MIL-100(Al) c) GUV/MOF-177/GUV d)  
 102 GUV/GUV/CuBDC e) GUVs/HKUST-1 f) GUVs/MIL-53(Fe) g) MIL-100(Fe)/GUVs/MIL-  
 103 100(Fe) h) GUV/UiO-66 i) GUV/MOF-808 j) GUVs in CaBDC k) GUVs in MgMOF-74. Scale  
 104 bars represent 20  $\mu\text{m}$ .

105

106

107

108

109

Supplementary Information for  
**Investigating Metal-Organic Frameworks Anchors for Giant Unilamellar Vesicle Immobilization**

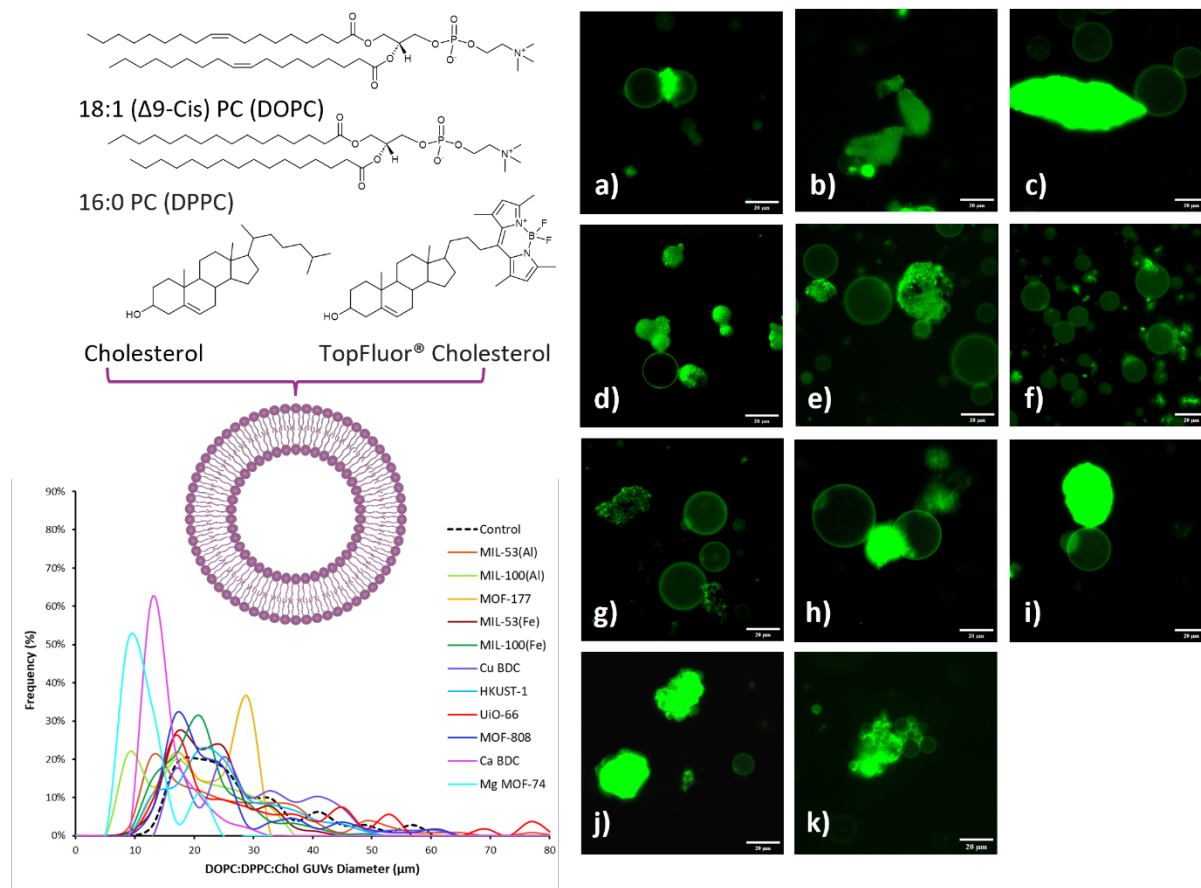

110  
 111 **Figure S5.** Fluorescence images of DOPC:DPPC:Chol (1:1:20 mol%) GUVs immobilized by  
 112 MOF particles **a)** GUV/MIL-53(Al) **b)** GUV/MIL-100(Al) **c)** MOF-177/GUV/GUV **d)**  
 113 CuBDC/GUV/CuBDC **e)** GUVs/HKUST-1 **f)** GUVs/MIL-53(Fe) **g)** GUV/MIL-100(Fe) **h)**  
 114 GUV/UiO-66/GUV **i)** GUV/MOF-808 **j)** GUV in CaBDC **k)** GUVs in MgMOF-74. Scale bars  
 115 represent 20  $\mu\text{m}$ .

116  
 117  
 118  
 119

# Supplementary Information for Investigating Metal-Organic Frameworks Anchors for Giant Unilamellar Vesicle Immobilization

## 120 Vesicle Diameter

121 The size distribution of GUVs is illustrated based on their lipidic composition; the diameters are  
122 rounded to the nearest whole number. The graphs are produced from analyzing GUVs samples  
123 from six separate runs (two per lipid mixture) for each MOF.

124

## 125 Aluminium MOFs with Phospholipids

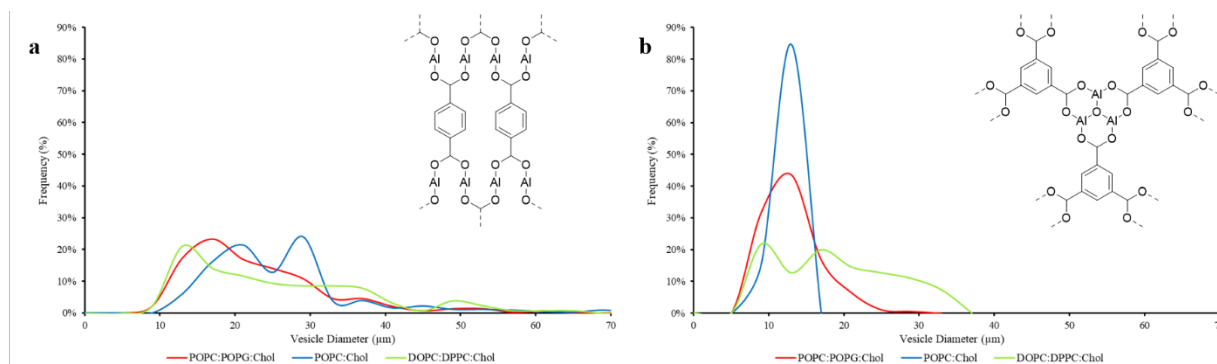

126

127 **Figure S6.** Size distribution of GUVs formed with POPC:POPG:Chol, POPC:Chol and  
128 DOPC:DPPC:Chol lipid composition in presence of MOFs **a)** MIL-53(Al) with mean diameter of  
129 28 µm, 18 µm and 26 µm, respectively **b)** MIL-100(Al) with mean diameter of 21 µm, 24 µm and  
130 24 µm, respectively. The graphs are produced from a dataset of 1010 GUVs formed in MIL-53(Al)  
131 and 254 GUVs in MIL-100(Al) in total.

132

133

134

135

136

137

138

139



# Supplementary Information for Investigating Metal-Organic Frameworks Anchors for Giant Unilamellar Vesicle Immobilization

## 140 *Zinc MOF with Phospholipids*

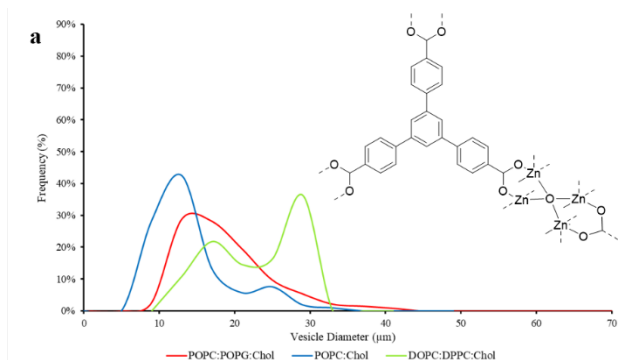

141  
142 **Figure S7.** Size distribution of GUVs formed with POPC:POPG:Chol, POPC:Chol and  
143 DOPC:DPPC:Chol lipid composition in presence of MOF-177 with mean diameter of 18 μm,  
144 12 μm and 28 μm, respectively. The graph is produced from a dataset of 666 GUVs formed in  
145 MOF-177 in total.

## 146 147 *Copper MOFs with Phospholipids*

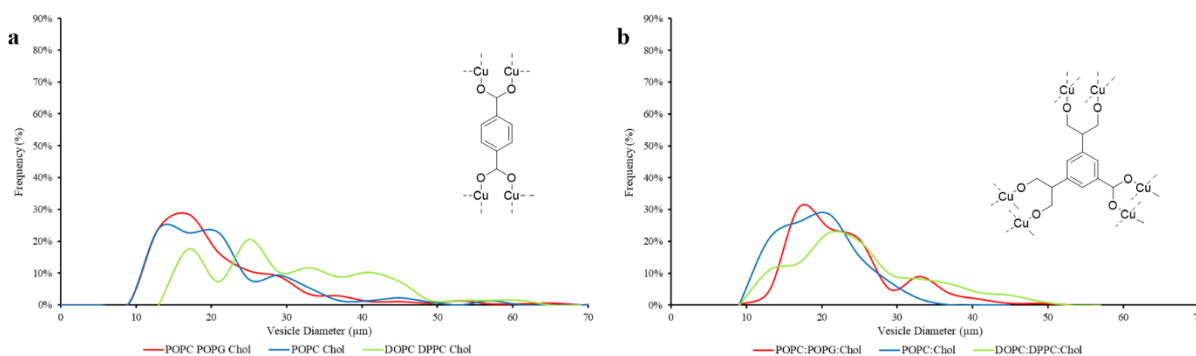

148  
149 **Figure S8.** Size distribution of GUVs formed with POPC:POPG:Chol, POPC:Chol and  
150 DOPC:DPPC:Chol lipid composition in presence of **a)** CuBDC MOF with mean diameter of  
151 20 μm, 20 μm and 28 μm, respectively **b)** HKUST-1 with mean diameter of 21 μm, 18 μm and 23  
152 μm, respectively. The graphs are produced from a dataset of 687 GUVs formed in CuBDC and  
153 742 GUVs in HKUST-1 in total.

154

# Supplementary Information for Investigating Metal-Organic Frameworks Anchors for Giant Unilamellar Vesicle Immobilization

## 155 *Iron MOFs with Phospholipids*

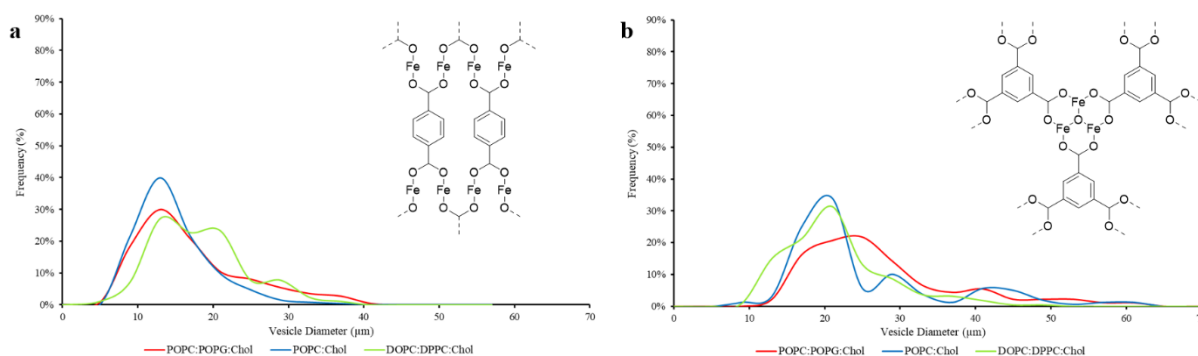

156  
157 **Figure S9.** Size distribution of GUVs formed with POPC:POPG:Chol, POPC:Chol and  
158 DOPC:DPPC:Chol lipid composition in presence of **a)** MIL-53(Fe) with mean diameter of 19 μm,  
159 17 μm and 20 μm, respectively **b)** MIL-100(Fe) with mean diameter of 25 μm, 23 μm and 20 μm,  
160 respectively. The graphs are produced from a dataset of 720 GUVs formed in MIL-53(Fe) and 471  
161 GUVs in MIL-100(Fe) in total.

162

## 163 *Zirconium MOFs with Phospholipids*

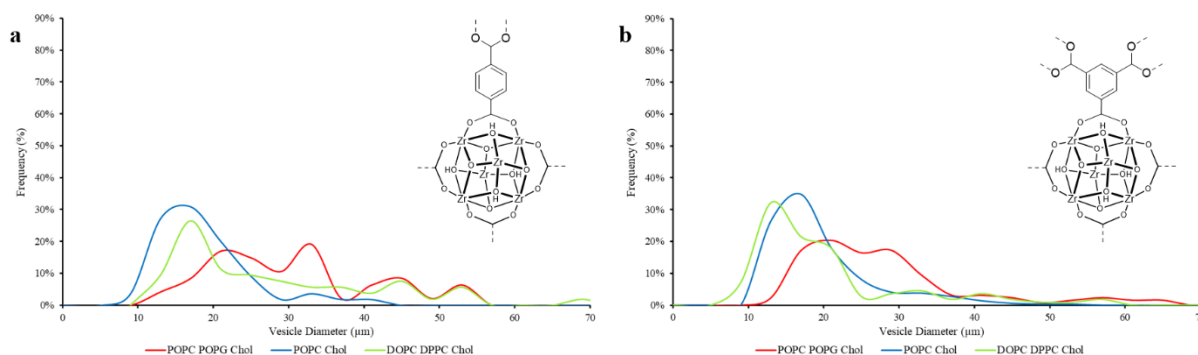

164  
165 **Figure S10.** Size distribution of GUVs formed with POPC:POPG:Chol, POPC:Chol and  
166 DOPC:DPPC:Chol lipid composition in presence of **a)** UiO-66 with mean diameter of 28 μm,  
167 17 μm and 28 μm, respectively **b)** and MOF-808 with mean diameter of 26 μm, 18 μm and 22 μm,  
168 respectively. The graphs are produced from a dataset of 155 GUVs formed in UiO-66 and 614  
169 GUVs in MOF-808 in total.

# Supplementary Information for Investigating Metal-Organic Frameworks Anchors for Giant Unilamellar Vesicle Immobilization

## 170 *Calcium and Magnesium MOFs with Phospholipids*

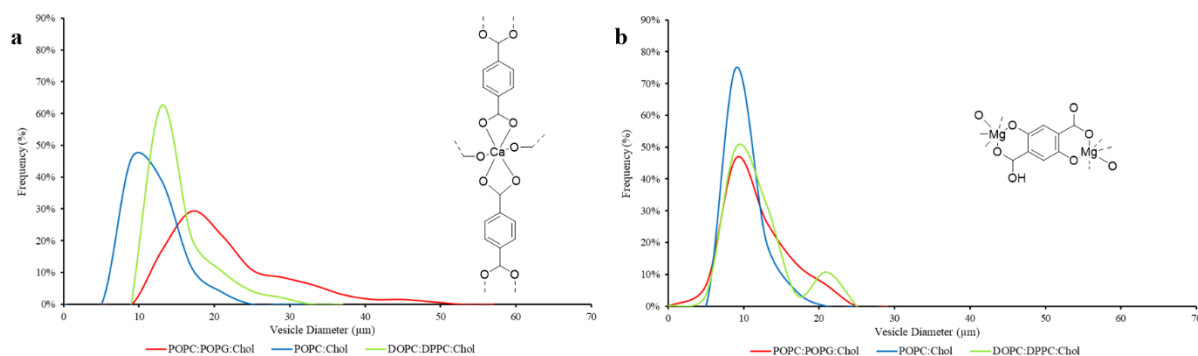

171  
172 **Figure S11.** Size distribution of GUVs formed with POPC:POPG:Chol, POPC:Chol and  
173 DOPC:DPPC:Chol lipid composition in presence of **a)** CaBDC with mean diameter of 20 µm,  
174 10 µm and 14 µm, respectively **b)** MgMOF-74 with mean diameter of 10 µm, 8 µm and 10 µm,  
175 respectively. The graphs are produced from a dataset of 335 GUVs formed in Ca BDC and 105  
176 GUVs in Mg MOF-74 in total.

177

178

179

180

181

182

183

184

185

186

187

## Supplementary Information for Investigating Metal-Organic Framework Anchors for Giant Unilamellar Vesicle Immobilization

### 188 **GUV Immobilization and Viability Images**

189 The GUVs were imaged at intervals of 6 hours and 12 hours, and the following section presents  
190 the results, highlighting the immobilized GUVs observed during these time periods.

191

192

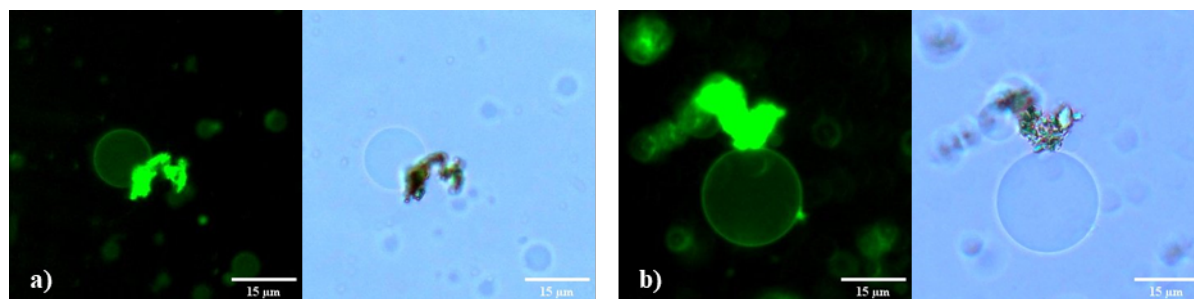

193

194 **Figure S12** MIL-100(Al) immobilized GUVs **a)** after 6 hours **b)** 12 hours **c)** deformed GUVs  
195 after 12 hours **d)** deformed GUVs **e)** GUV aggregates.

196

197

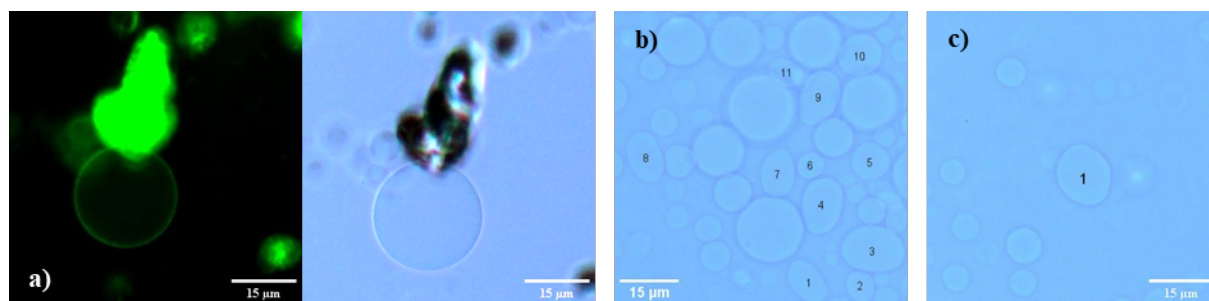

198 **Figure S13** MOF-177 immobilized GUVs **a)** after 6 hours **b)** oblong shaped GUVs seen after  
199 electroformation **c)** oblong shaped GUV.

200

Supplementary Information for  
**Investigating Metal-Organic Frameworks Anchors for Giant Unilamellar  
Vesicle Immobilization**

201

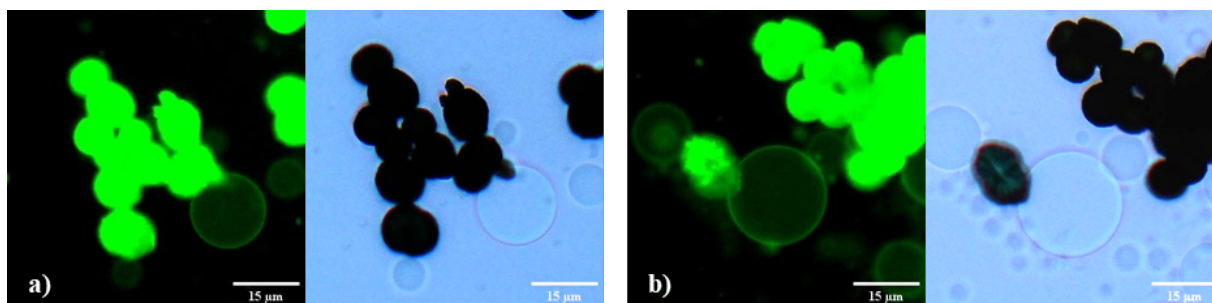

202

203 **Figure S14** CuBDC immobilized GUVs **a)** after 6 hours **b)** after 12 hours.

204

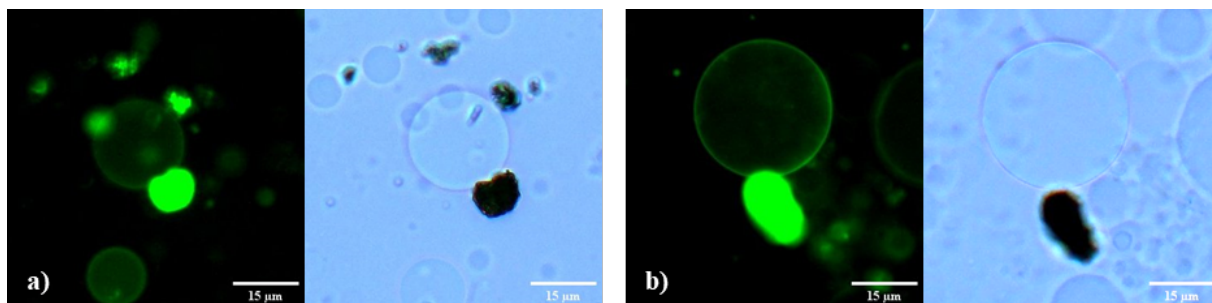

205

206 **Figure S15** HKUST-1 immobilized GUVs **a)** after 6 hours **b)** after 12 hours.

207

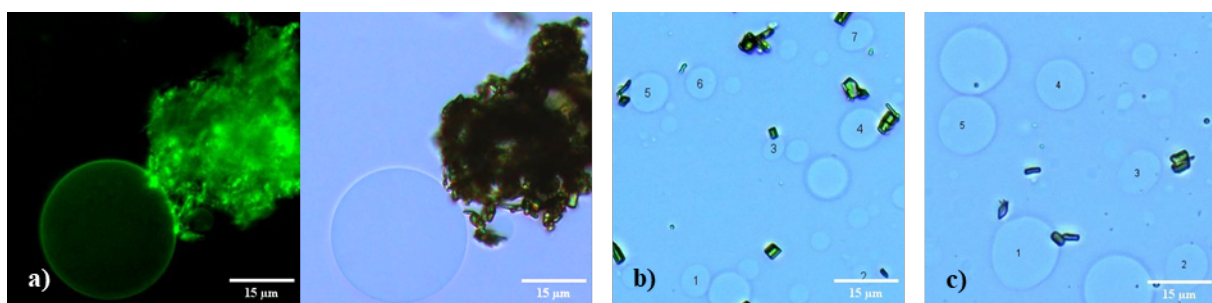

208

209 **Figure S16** MIL-53(Fe) immobilized GUVs **a)** GUV anchored to cluster after 6 hours **b)**  
210 unbound mobile GUVs **c)** oblong shaped GUVs.

211

Supplementary Information for  
**Investigating Metal-Organic Framework Anchors for Giant Unilamellar  
Vesicle Immobilization**

212

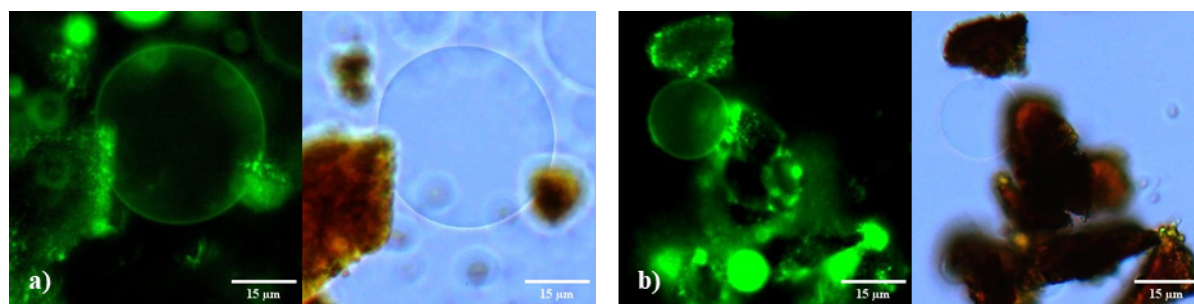

213 **Figure S17** MIL-100(Fe) immobilized GUVs **a)** after 6 hours **b)** after 12 hours.

214

215

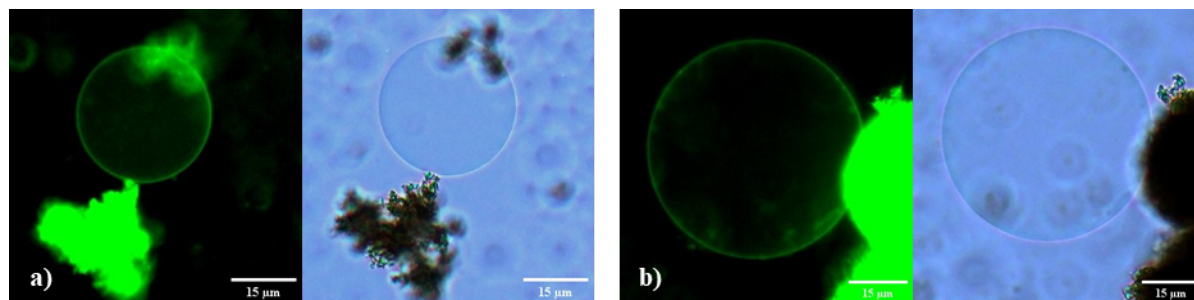

216 **Figure S18** UiO-66 immobilized GUVs **a)** after 6 hours **b)** after 12 hours.

217

218

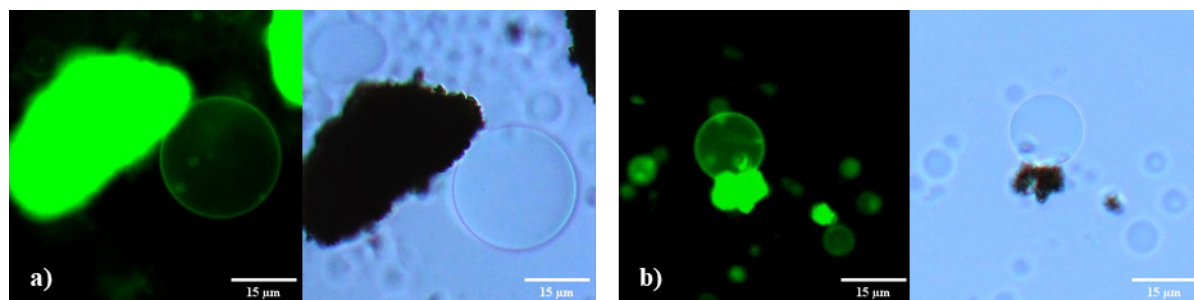

219 **Figure S19** MOF-808 immobilized GUVs **a)** after 6 hours **b)** after 12 hours.

Supplementary Information for  
**Investigating Metal-Organic Frameworks Anchors for Giant Unilamellar  
Vesicle Immobilization**

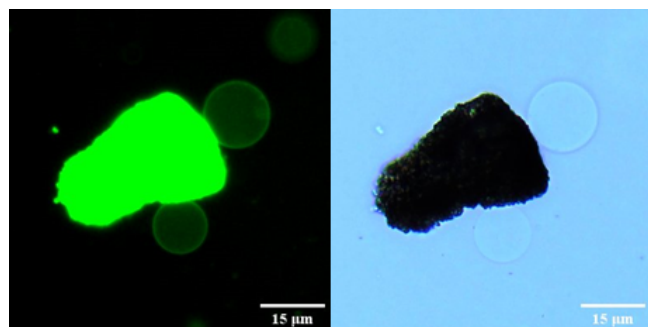

220

221 **Figure S20** CaBDC immobilized GUVs after 6 hours

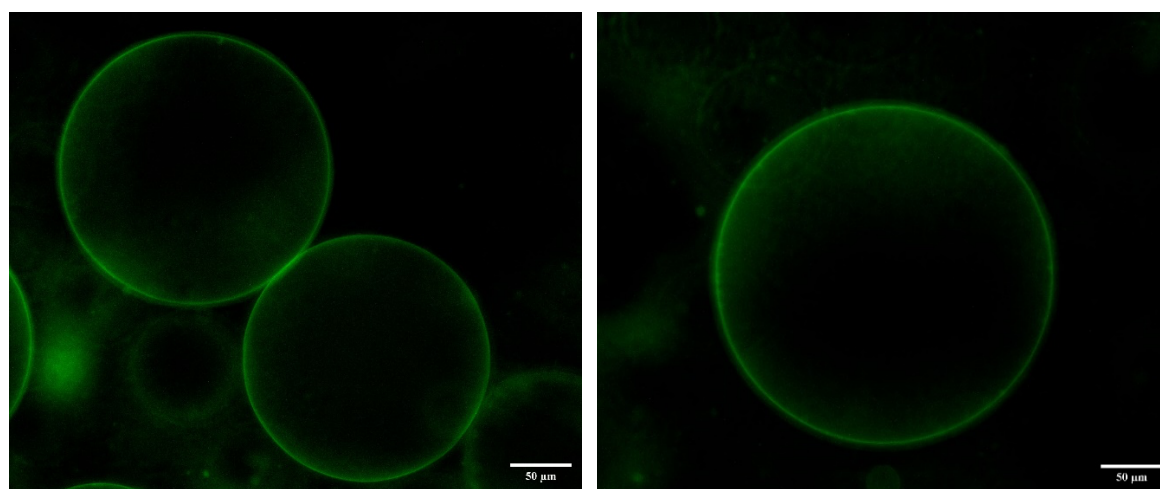

222

223 **Figure S21** Giant vesicles in MIL-53(Al)

224

225

226

227

228

229

230

231

Supplementary Information for  
**Investigating Metal-Organic Frameworks Anchors for Giant Unilamellar  
Vesicle Immobilization**

232 **MOF Synthesis Protocols**

233 All MOF particles were synthesized based on literature procedures and were characterized using  
234 SEM, EDS, and PXRD.

235 Powder x-Ray diffractograms were measured on a Malvern P'Analytical Empyran Powder X-  
236 Ray diffractometer using a copper source. The scan step size was set to 0.008356 with a time per  
237 scan of 10.795 seconds.

238 The SEM images were collected at the UNB Microscopy and Microanalysis Facility with a JEOL  
239 JSM-6400 Scanning Electron Microscope using an accelerating voltage of 15 kV. Images were  
240 acquired using a Digiscan II operated by Gatan Digital Micrograph software. The SEM images of  
241 UiO-66 And Mg MOF-74 were captured by ThermoScientific Scios 2 Dualbeam SEM system.  
242 The MOF samples were attached to mounting stubs using a carbon tape and coated with gold for  
243 conductivity by sputtering using an Edwards S150A coater.

244 The EDS analysis of MOFs was also performed at the UNB Microscopy and Microanalysis  
245 Facility with a JEOL JSM-6400 Scanning Electron Microscope equipped with an EDAX Genesis  
246 4000 Energy Dispersive X-ray (EDS) analyser. The MOF samples were carbon coated using an  
247 Edwards 306A carbon coater prior to observation. EDS analysis was performed at an accelerating  
248 voltage of 15 kV and a beam current of 1.5 nA, with a working distance of 14 mm. Collection time  
249 was 50 seconds per analysis point. The EDS of UiO-66 was performed on ThermoScientific Scios  
250 2 Dualbeam, equipped with an Oxford Ultim Max 170 EDS detector, and an Oxford Symmetry  
251 EBSD detector controller by the Aztec software using similar conditions with beam current 3.2  
252 nA.

253 ***MIL-53(Al)***

254 2.5835 g (8.048 mmol) of  $\text{Al}(\text{NO}_3)_3 \cdot 6\text{H}_2\text{O}$  and 5.7200 g (34.45 mmol) of terephthalic acid were  
255 combined in a 50 mL flask, followed by 10 mL of water. The solution was sonicated for 5 minutes,  
256 then transferred to a 50 mL Teflon lined autoclave and heated at 150°C overnight.<sup>2</sup>

257 Once removed from heat the reaction vessel was allowed to cool to room temperature. The solution  
258 and precipitate were transferred into a centrifuge tube, centrifuged for 5 minutes, and the solution  
259 was decanted. 10 mL of water was added to the centrifuge tube and the precipitate was shaken to



## Supplementary Information for Investigating Metal-Organic Frameworks Anchors for Giant Unilamellar Vesicle Immobilization

260 redistribute. The mixture was then centrifuged for 5 minutes, and the solution decanted. This  
261 process was completed 3 times with water, and 3 with methanol.

262 The remaining precipitate was transferred to a 50 mL round bottom flask and 30 mL of DMF was  
263 added, followed by refluxing overnight. Once reflux was completed, the mixture was cooled to  
264 room temperature and transferred to a centrifuge tube, centrifuged for 5 minutes, and the solution  
265 was decanted. 10 mL of methanol was added, centrifuged for 5 minutes, and the liquid was  
266 decanted. The remaining precipitate was placed in an 80°C oven for 3 hours to dry.

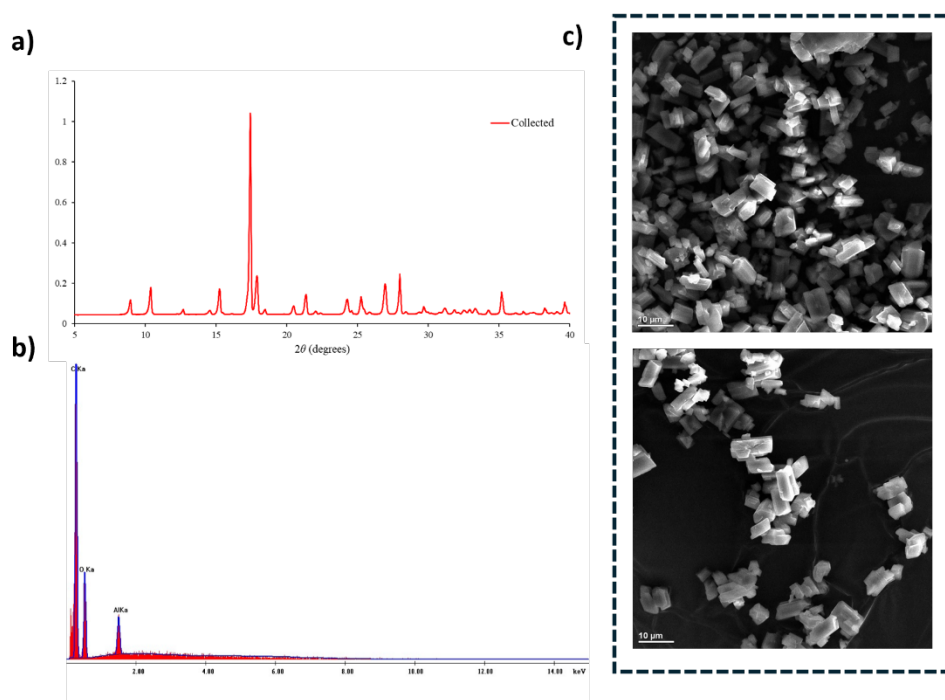

267

268 **Figure S22.** a) pXRD collected b) EDS c) SEM of MIL-53(Al)

269

### 270 *MIL-100(Al)*

271 0.4020 g (1.252 mmol) of  $\text{Al}(\text{NO}_3)_3 \cdot 6\text{H}_2\text{O}$  and 0.01827 g (0.8694 mmol) of 1,3,5-trimethyl  
272 benzene dicarboxylate were combined in a 50 mL flask, followed by 5 mL of water and 0.06 mL  
273 of DMF. The solution was sonicated for 5 minutes, then transferred to a 50 mL Teflon lined  
274 autoclave and heated at 220°C for 4 hours.<sup>3</sup>

## Supplementary Information for Investigating Metal-Organic Frameworks Anchors for Giant Unilamellar Vesicle Immobilization

275 Once removed from heat the reaction vessel was allowed to cool to room temperature. The solution  
276 and precipitate were transferred into a centrifuge tube, centrifuged for 5 minutes, and the solution  
277 was decanted. 10 mL of water was added to the centrifuge tube and the precipitate was shaken to  
278 redistribute. The mixture was then centrifuged for 5 minutes, and the solution decanted. This  
279 process was completed 3 times with water, and 3 with methanol.

280 The remaining precipitate was transferred to a 50 mL round bottom flask and 30 mL of DMF was  
281 added, followed by refluxing overnight. Once reflux was completed, the mixture was cooled to  
282 room temperature and transferred to a centrifuge tube, centrifuged for 5 minutes, and the solution  
283 was decanted. 10 mL of methanol was added, centrifuged for 5 minutes, and the liquid was  
284 decanted. The remaining precipitate was placed in an 80°C oven for 3 hours to dry.

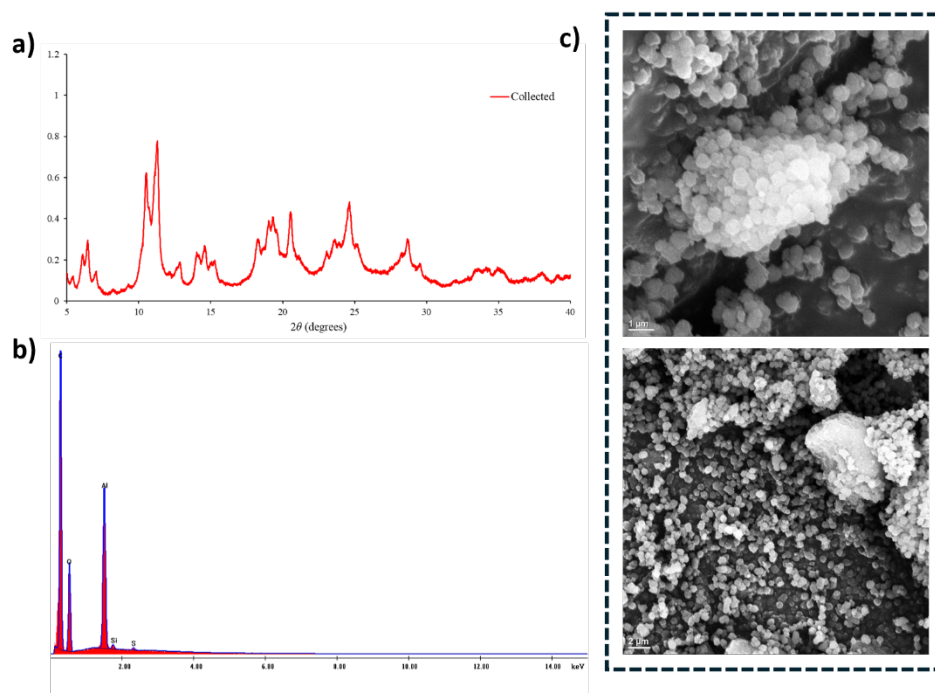

285

286 **Figure S23.** a) pxrd collected b) EDS c) SEM of MIL-100(Al)

287

288 **MOF-177**

289 MOF-177 was synthesized following a modified literature procedure.<sup>4</sup> 0.6005 g (2.018 mmol) of  
290  $\text{Zn}(\text{NO}_3)_2 \cdot 6\text{H}_2\text{O}$  and 0.1201 g (0.2739 mmol) of 1,3,5-Tris(4-carboxyphenyl)benzene were added

Supplementary Information for  
**Investigating Metal-Organic Frameworks Anchors for Giant Unilamellar Vesicle Immobilization**

291 to a 100 mL flask followed by 40 mL DMF. The solution was sonicated for 5 minutes and then  
292 placed in an oven at 70 °C for 7 days.

293 The solution and precipitate were cooled to room temperature and then centrifuged for 5 minutes.  
294 The solution was decanted, and the precipitate was washed with 10 mL DMF and chloroform  
295 thrice. The resulting crystals were dried in the oven at 70 °C for 3 hours.

296

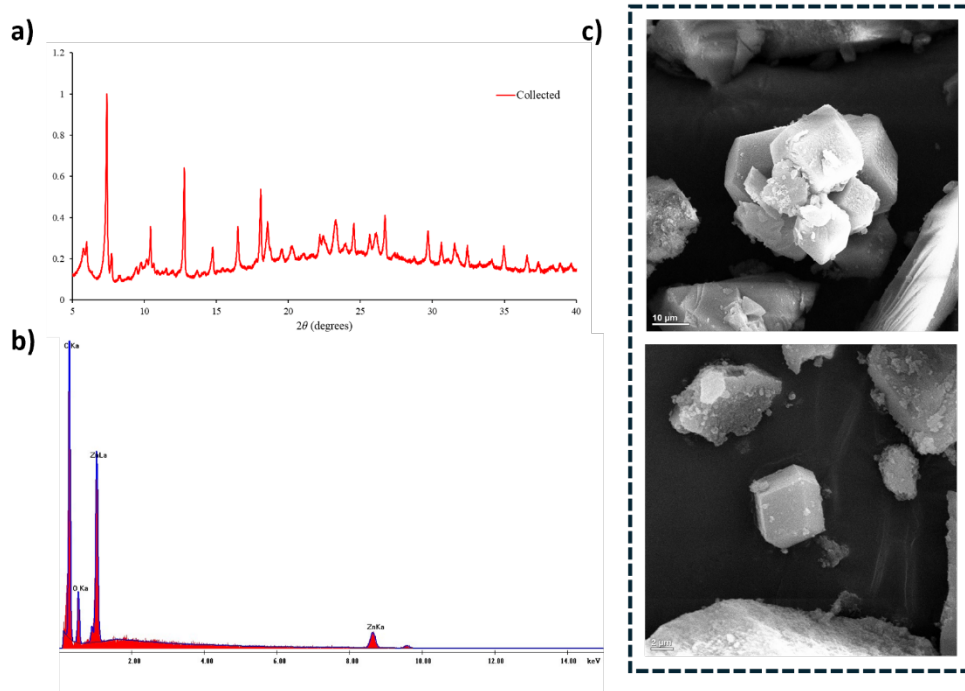

297

298 **Figure S24.** a) pxd collected b) EDS c) SEM of MOF-177.

299

300 ***CuBDC***

301 1.3205 g (5.694 mmol) of  $\text{Cu}(\text{NO}_3)_2 \cdot 2.5\text{H}_2\text{O}$  and 0.3287 g (1.980 mmol) of terephthalic acid were  
302 combined in a 50 mL flask followed by 24 mL of DMF/ethanol (2:1) solution. The solution was  
303 sonicated for 5 minutes, then transferred to a 50 mL Teflon lined autoclave and heated at 120°C  
304 for 16 hours.<sup>5</sup>

305 Once removed from heat the reaction vessel was allowed to cool to room temperature. The solution  
306 and precipitate were transferred into a centrifuge tube, centrifuged for 5 minutes, and the solution

## Supplementary Information for Investigating Metal-Organic Frameworks Anchors for Giant Unilamellar Vesicle Immobilization

307 was decanted. 10 mL of DMF was added to the centrifuge tube and the precipitate was shaken to  
308 redistribute. The mixture was then centrifuged for 5 minutes, and the solution decanted. This  
309 process was completed 3 times with DMF and 3 times with ethanol. The remaining precipitate was  
310 placed in an 80°C oven for 3 hours to dry.

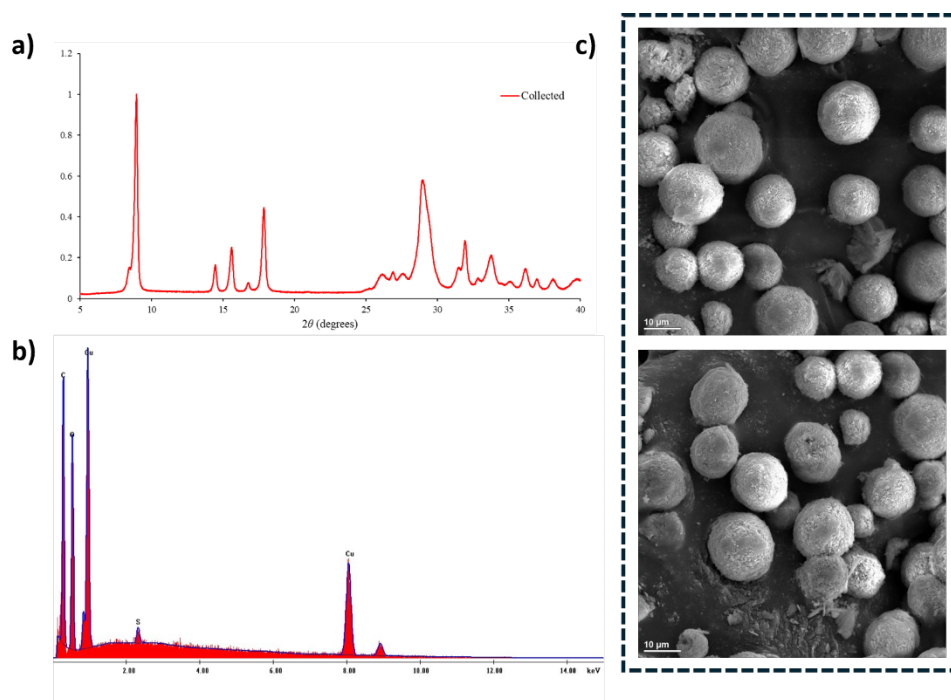

311

312

313 **Figure S25.** a) pxd collected b) EDS c) SEM of CuBDC.

314

### 315 *HKUST-1*

316 0.3034 g (1.308 mmol) of  $\text{Cu}(\text{NO}_3)_2 \cdot 2.5\text{H}_2\text{O}$  and 0.2119 g (1.009 mmol) of  
317 1,3,5-benzenetricarboxylate were combined in a 50 mL flask, followed by 15 mL of water/ethanol  
318 (1:1) mixture. The solution was sonicated for 5 minutes, then transferred to a 50 mL Teflon lined  
319 autoclave and heated at 110°C for 16 hours.<sup>6</sup>

320 Once removed from heat the reaction vessel was allowed to cool to room temperature. The solution  
321 and precipitate were transferred into a centrifuge tube, centrifuged for 5 minutes, and the solution  
322 was decanted. 10 mL of ethanol was added to the centrifuge tube and the precipitate was shaken

## Supplementary Information for Investigating Metal-Organic Frameworks Anchors for Giant Unilamellar Vesicle Immobilization

323 to redistribute. The mixture was then centrifuged for 5 minutes, and the solution decanted. This  
324 process was completed 3 times.

325 The remaining precipitate was transferred into an 80°C oven for 3 hours to dry. The solid was then  
326 transferred to a 25 mL round bottom flask and heated to 150°C overnight under vacuum.

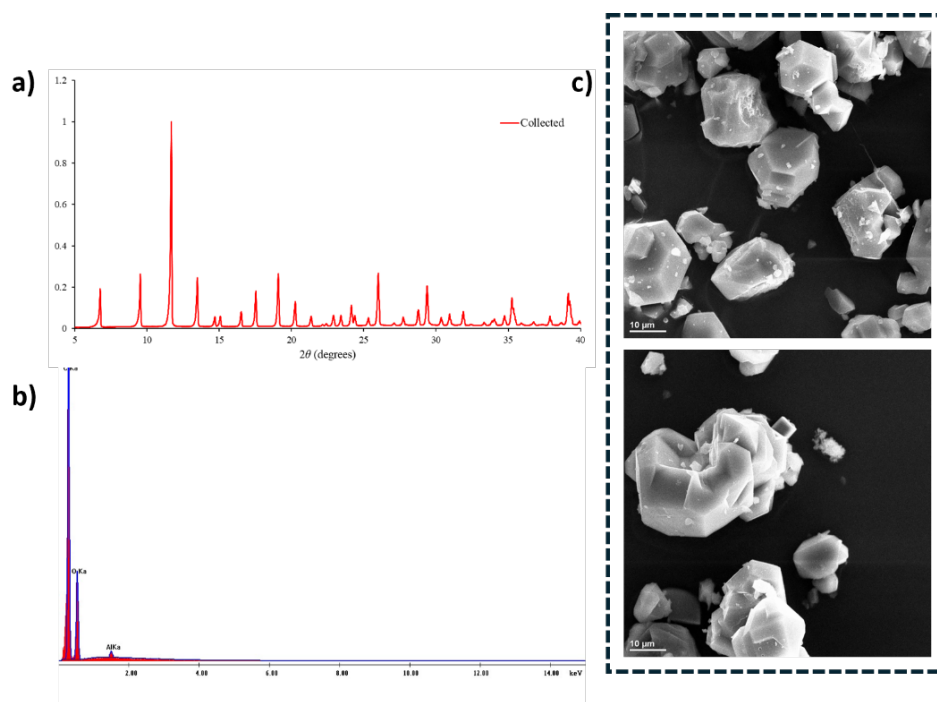

327  
328 **Figure S26.** a) pxd collected b) EDS c) SEM of HKUST-1

329

### 330 *MIL-100(Fe)*

331 0.9934 g (3.694 mmol) of  $\text{FeCl}_3 \cdot 6\text{H}_2\text{O}$  and 0.4361 g (2.055 mmol) of 1,3,5-benzenetricarboxylate  
332 were added to a 50 mL flask, followed by 10 mL of water and 0.12 mL of concentrated  $\text{HNO}_3$ . The  
333 solution was sonicated for 5 minutes. The solution was transferred to a 50 mL Teflon lined  
334 autoclave and heated at 150°C overnight.<sup>7</sup>

335 Once removed from heat the reaction vessel was allowed to cool to room temperature. The solution  
336 and precipitate were transferred into a centrifuge tube, centrifuged for 5 minutes, and the solution  
337 was decanted. 10 mL of water was added to the centrifuge tube and the precipitate was shaken to

## Supplementary Information for Investigating Metal-Organic Frameworks Anchors for Giant Unilamellar Vesicle Immobilization

338 redistribute. The mixture was then centrifuged for 5 minutes, and the solution decanted. This  
339 process was completed 3 times with water, and 3 with methanol.

340 The remaining precipitate was transferred to a 50 mL round bottom flask and 15 mL of DMF was  
341 added, followed by refluxing overnight. Once reflux was completed, the mixture was cooled to  
342 room temperature and transferred to a centrifuge tube, centrifuged for 5 minutes, and the solution  
343 was decanted. 10 mL of methanol was added, centrifuged for 5 minutes, and the liquid was  
344 decanted. The remaining precipitate was placed in an 80°C oven for 3 hours to dry.

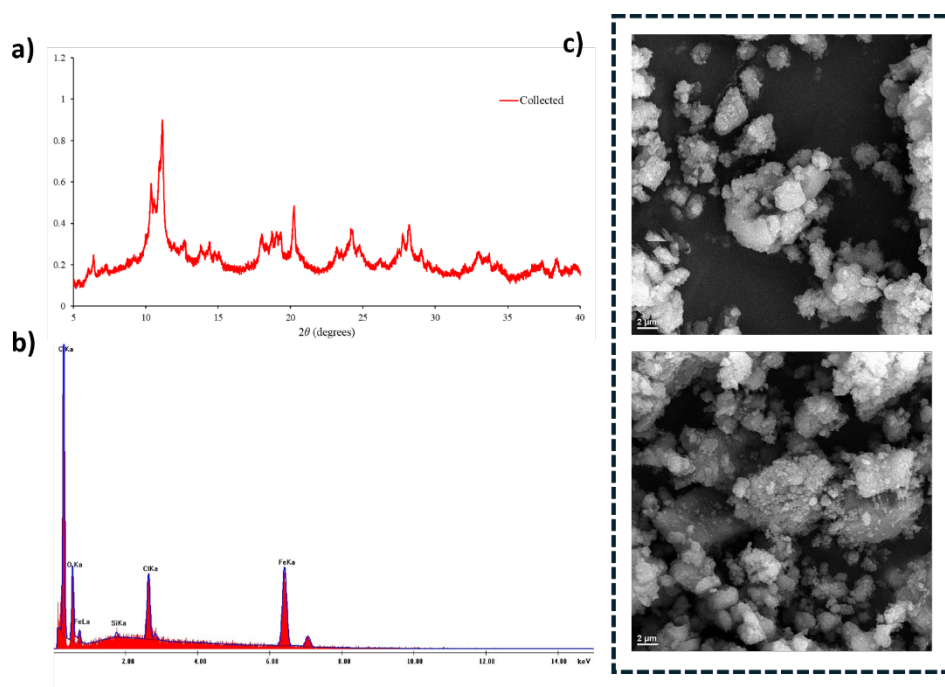

345  
346 **Figure S27.** a) pxd collected b) EDS c) SEM of MIL-100(Fe).

347

### 348 *MIL-53(Fe)*

349 In a modified literature prep, 0.5428 g (2.019 mmol) of  $\text{FeCl}_3 \cdot 6\text{H}_2\text{O}$  0.3366 g (2.027 mmol) of  
350 terephthalic acid were added to a 50 mL flask, followed by 11 mL of DMF. The solution was  
351 sonicated for 5 minutes. The solution was transferred to a 50 mL Teflon lined autoclave and heated  
352 at 150°C overnight.<sup>2</sup>

## Supplementary Information for Investigating Metal-Organic Frameworks Anchors for Giant Unilamellar Vesicle Immobilization

353 Once removed from heat the reaction vessel was allowed to cool to room temperature. The solution  
354 and precipitate were transferred into a centrifuge tube, centrifuged for 5 minutes, and the solution  
355 was decanted. 10 mL of water was added to the centrifuge tube and the precipitate was shaken to  
356 redistribute. The mixture was then centrifuged for 5 minutes, and the solution decanted. This  
357 process was completed 3 times with water, and 3 with methanol.

358 The remaining precipitate was transferred to a 50 mL round bottom flask and 15 mL of DMF was  
359 added, followed by refluxing overnight. Once reflux was completed, the mixture was cooled to  
360 room temperature and transferred to a centrifuge tube, centrifuged for 5 minutes, and the solution  
361 was decanted. 10 mL of methanol was added, centrifuged for 5 minutes, and the liquid was  
362 decanted. The remaining precipitate was placed in an 80°C oven for 3 hours to dry.

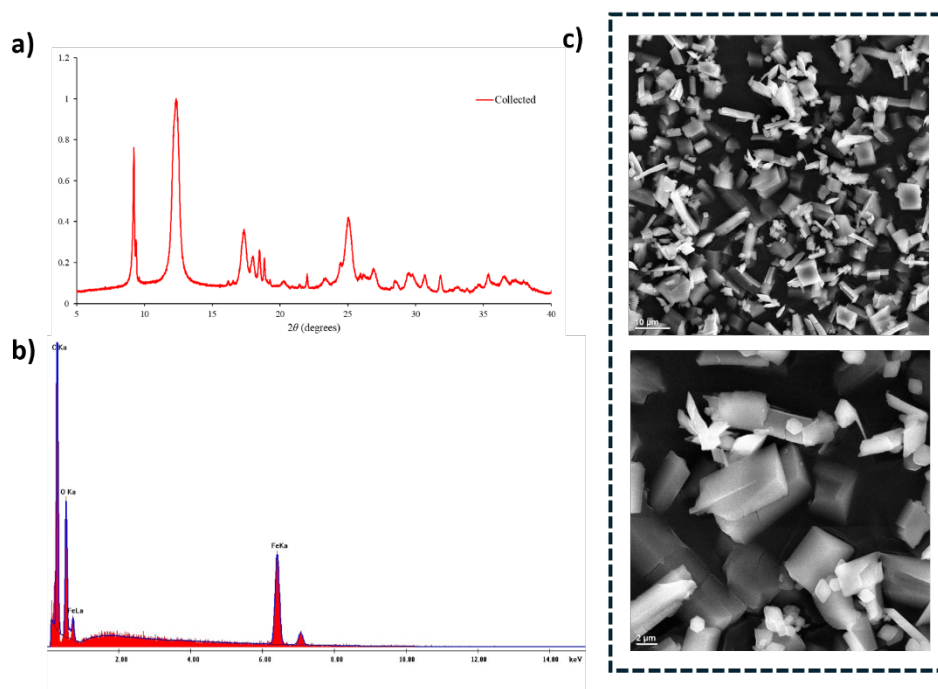

363

364 **Figure S28.** a) paxrd collected b) EDS c) SEM of MIL-53(Fe).

365

366 ***UiO-66***

367 UiO-66 was synthesized using a modified literature procedure.<sup>8</sup> 0.1250 g (0.5363 mmol) ZrCl<sub>4</sub>,  
368 0.1250 g (0.7524 mmol) of terephthalic acid was added to a 8 dram vial followed by 15 mL DMF

## Supplementary Information for Investigating Metal-Organic Frameworks Anchors for Giant Unilamellar Vesicle Immobilization

369 and 1 mL HCL. The mixture was sonicated for 5 minutes. The reaction was then placed in an oven  
370 at 80°C for 24 hours. The vial was cooled to room temperature, the solution and precipitate was  
371 transferred to a centrifuge tube. After centrifugation for 5 minutes the solution was decanted. The  
372 precipitate was washed by centrifugating for 5 minutes with 10 mL DMF and ethanol, each for  
373 three times. Following washes the precipitate was placed in an 80°C oven for 3 hours to dry.

374

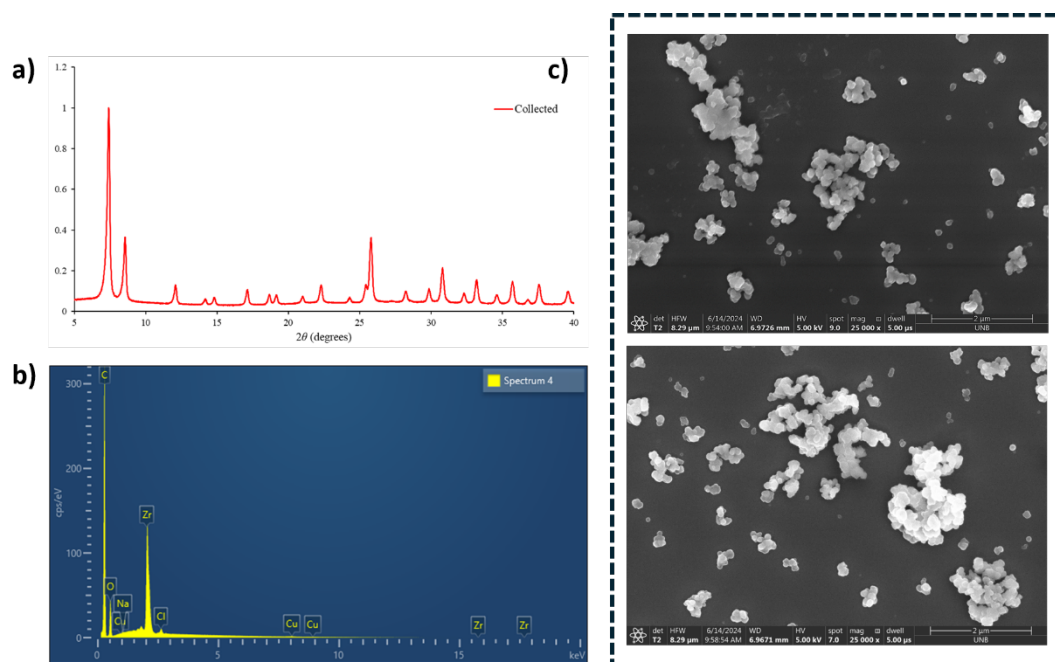

375

376 **Figure S29.** a) pxd collected b) EDS c) SEM of UiO-66.

377

### 378 **MOF-808**

379 0.4320 g (1.350 mmol) of  $ZrOCl_2 \cdot 8H_2O$  and 0.3063g (1.458 mmol) of 1,3,5-benzenetricarboxylate  
380 were added to a 100 mL flask followed by 25 mL DMF and 26 mL of formic acid. The mixture  
381 was sonicated for 5 minutes then transferred to a 100 mL flask, capped and placed in a 110°C oven  
382 for 48 hours.

383 Once removed from heat the reaction vessel was allowed to cool to room temperature. The solution  
384 and precipitate were transferred into a centrifuge tube, centrifuged for 5 minutes, and the solution



## Supplementary Information for Investigating Metal-Organic Frameworks Anchors for Giant Unilamellar Vesicle Immobilization

385 was decanted. 15 mL of DMF was added and the resulting solution was transferred to a round  
386 bottom flask and refluxed overnight. Once reflux was completed, the mixture was cooled to room  
387 temperature and transferred to a centrifuge tube, centrifuged for 5 minutes, and the solution was  
388 decanted. 10 mL of methanol was added, centrifuged for 5 minutes, and the liquid was decanted.  
389 The remaining precipitate was placed in an 80°C oven for 3 hours to dry.<sup>9</sup>

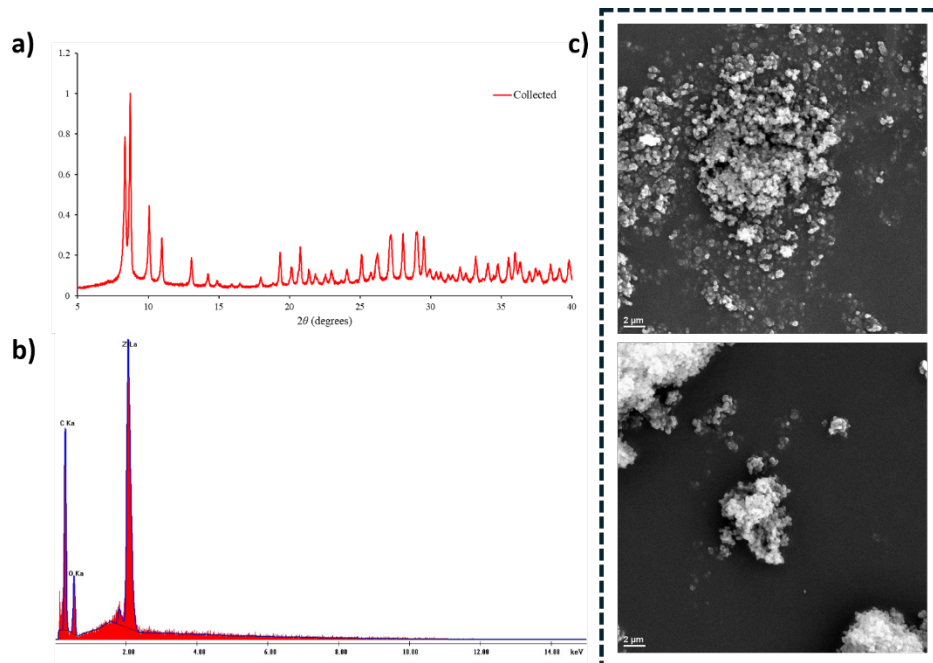

390

391 **Figure S30.** a) paxrd collected b) EDS c) SEM of MOF-808.

392

### 393 *CaBDC*

394 0.2362 g (1.001 mmol) of  $\text{Ca}(\text{NO}_3)_2 \cdot 4\text{H}_2\text{O}$  and 0.0836 g (0.5035 mmol) of terephthalic acid were  
395 added to a 20 mL glass vial followed by 7 mL of DMF. The solution was sonicated for 5 minutes  
396 then placed in a 120°C oven for 3 days. Once heating was completed the vial was cooled to room  
397 temperature.

398 The solution and resulting precipitate were transferred to a centrifuge tub and centrifuged for 5  
399 minutes. The remaining solution was decanted, and 10 mL of DMF added to the centrifuge tube  
400 and the precipitate was shaken to redistribute. The mixture was then centrifuged for 5 minutes, and

## Supplementary Information for Investigating Metal-Organic Frameworks Anchors for Giant Unilamellar Vesicle Immobilization

401 the solution decanted. This process was completed 3 times with DMF, and 3 with methanol. The  
402 remaining precipitate was transferred into an 80°C oven for 3 hours to dry.<sup>10</sup>

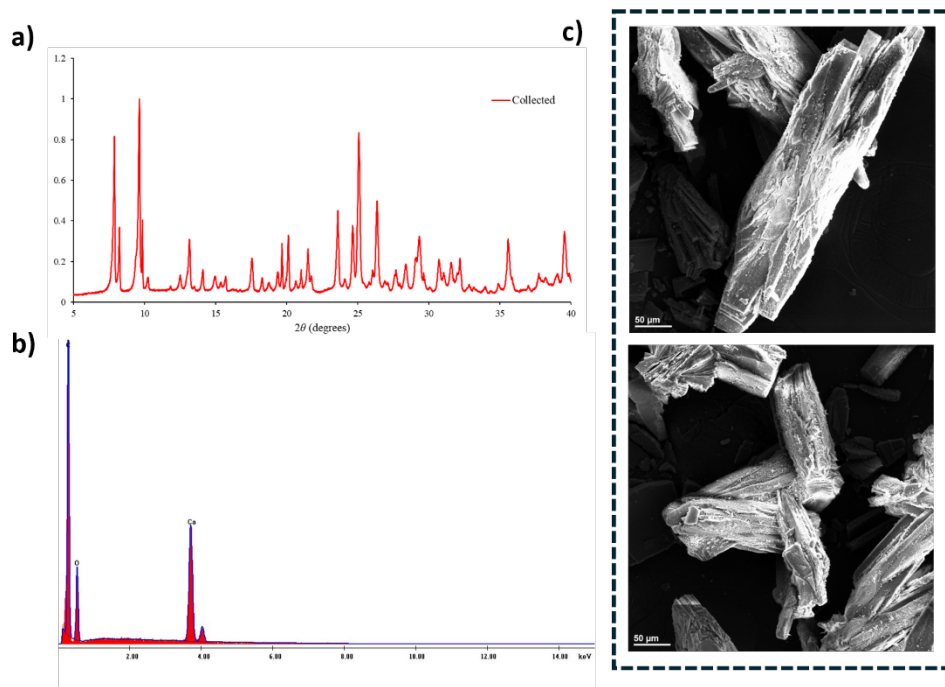

403  
404 **Figure S31.** a) pxd collected b) EDS c) SEM of CaBDC.

### 405 *MgMOF-74*

406 0.7120 g (2.438 mmol) of  $\text{Mg}(\text{NO}_3)_2 \cdot 8\text{H}_2\text{O}$  and 0.1680 g (0.8484 mmol) of 2,5-dihydroxybenzoic  
407 acid were added to a 50 mL flask followed by 15 mL of DMF, 1 mL of ethanol and 1 mL of water.  
408 The mixture was sonicated for 5 minutes. After sonication the solution was transferred to a 50 mL  
409 Teflon lined autoclave and heated at 125°C overnight. Once heating was completed the reaction  
410 vessel was cooled to room temperature.<sup>11</sup>

411 The mixture was transferred into a centrifuge tube, centrifuged for 5 minutes, and the solution was  
412 decanted. 10 mL of DMF was added to the centrifuge tube and the precipitate was shaken to  
413 redistribute. The mixture was then centrifuged for 5 minutes, and the solution decanted. This  
414 process was completed 3 times with DMF and 3 times with ethanol. The remaining precipitate was  
415 placed in an 80°C oven for 3 hours to dry.

# Supplementary Information for Investigating Metal-Organic Frameworks Anchors for Giant Unilamellar Vesicle Immobilization

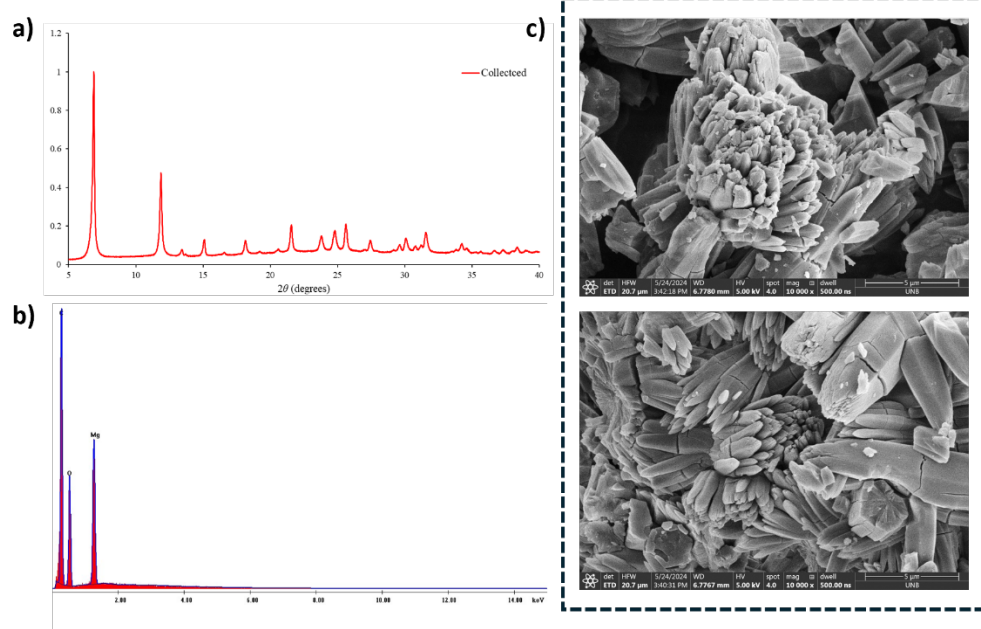

416

417 **Figure S32.** a) pxrd collected b) EDS c) SEM of MgMOF-74

418

## Supplementary Information for Investigating Metal-Organic Frameworks Anchors for Giant Unilamellar Vesicle Immobilization

### 419 ICP-OES Analysis

420 To monitor the decomposition of MOF-177 in solution a series of Inductively coupled plasma  
421 optical emission spectroscopy (ICP-OES) experiments were performed. A small amount of MOF-  
422 177 (1.5-1.8 mg) was placed in the GUV solution used throughout the imaging experiments (0.7  
423 mL). 0.1 mL of this solution was removed every 2 hours over the course of 12 hours. Caution was  
424 taken to ensure that no MOF was removed during removal of the supernatant. These aliquots were  
425 brought up to a total volume of 5 mL using deionized water and concentrated nitric acid (1 part in  
426 20). The solutions were then analysed on a Varian Vista MPX CCD equipped with simultaneous  
427 ICP OES. As a control the experiments were repeated under same conditions with a zirconium  
428 MOF UiO-66 which is known to be a water stable framework.

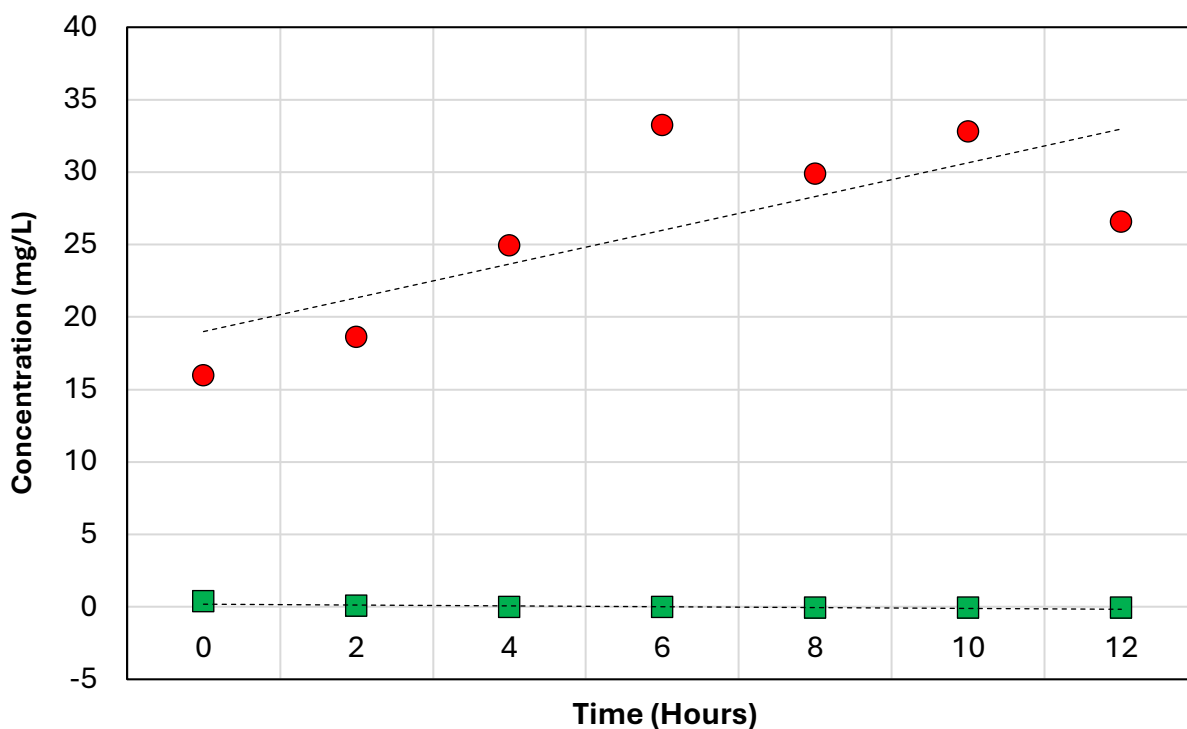

429  
430 **Figure S33.** Concentration of zinc ions (red circles), and zirconium ions (green squares) from  
431 GUV solutions containing MOF-177 and UiO-66 respectively.

432

433

## Supplementary Information for Investigating Metal-Organic Frameworks Anchors for Giant Unilamellar Vesicle Immobilization

434 To further reflect on the dissolution of MOF-177, we electroformed POPC:POPG:Chol GUVs with  
435 MOF-177 and imaged MOF particles after 2 hours for 12 hours. The images showed obvious  
436 structural changes over time, indicative of gradual dissociation of MOF particles. Though  
437 complete dissolution was not observed, these morphological observations aligned with the results  
438 from ICP-OES analysis, which demonstrated an increase in zinc ion concentration in the  
439 supernatant over time.

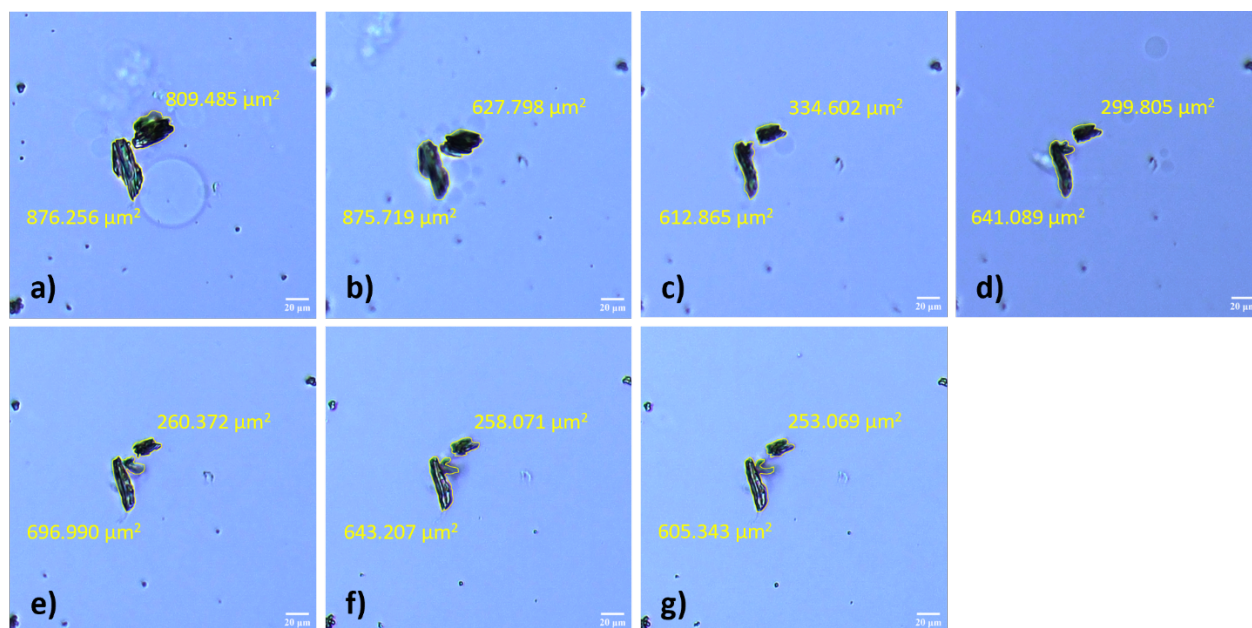

440  
441 **Figure S34.** The brightfield images of GUV@MOF-177 imaged for 2 hour for 12 hours indicating  
442 changes in MOF structure.

443  
444 **Confocal Z-stacks**  
445 Confocal z-stacks were collected to examine the interaction of GUVs membrane immobilized by  
446 different MOFs. Imaging was performed using 0.1 mol% TopFluor® cholesterol labeled  
447 POPC:POPG:Chol (4:1:1) lipid mixture. The z-stacks demonstrated the spatial interaction between  
448 GUVs and MOFs (supplementary videos 11-14). The 3D reconstructions of these z-stacks are  
449 shown below.

Supplementary Information for  
**Investigating Metal-Organic Framework Anchors for Giant Unilamellar  
Vesicle Immobilization**

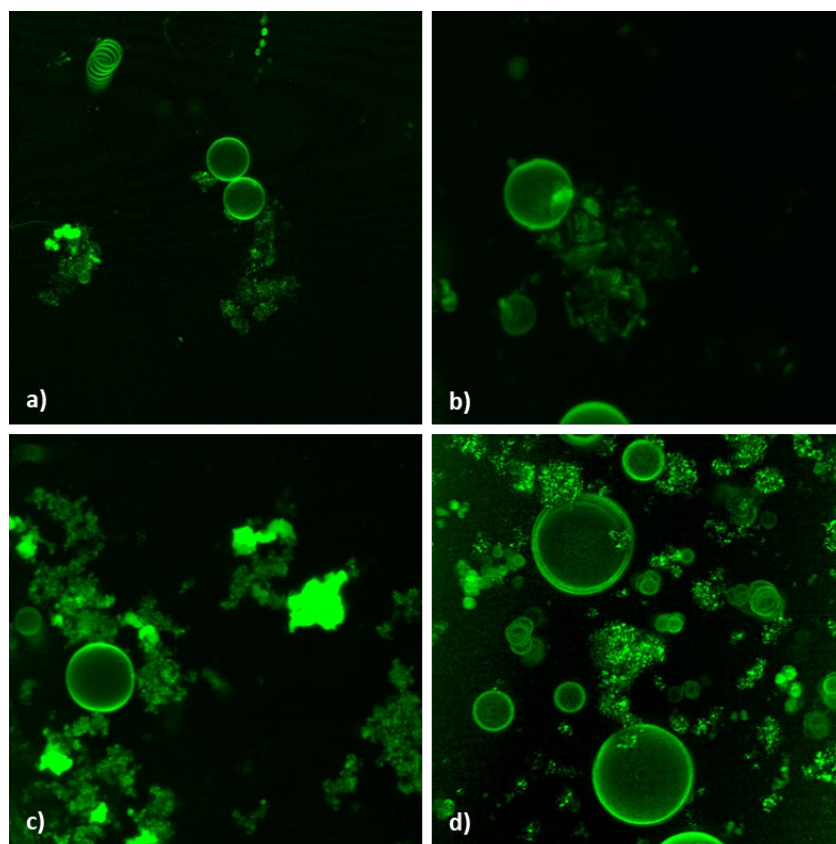

450

451 **Figure S35.** Confocal z-stack images a) GUV@MIL-100(Fe) b) HKUST-1 c) UiO-66 d) MOF-  
452 808

453 **GUV@MOF SEM**

454 The SEM images of POPC:POPG:Chol (4:1:1) GUV@MOF adduct were collected at the Digital  
455 Microscopy Facility at Mount Allison University using Hitachi SU3500 SEM operating at 10 kV,  
456 10 mm working distance, and 0.1 nA beam current. The EDS spectra were recorded by Oxford  
457 Instruments AZtec/X-Max 20 EDS system. Spectra acquired from 0-10 keV into 1024 channels,  
458 100 second dead-time corrected acquisitions from areas indicated by bounding-boxes in the screen  
459 shots. The GUV@MOF samples with HKUST-1 and MOF-808 were vapor fixed with 2% OsO<sub>4</sub>  
460 for 4 hours and deposited onto 1 μm pore-size polycarbonate filters, mounted onto SEM support  
461 with double-side tape, rimmed with colloidal carbon and coated with ca. 10 nm gold in a Hummer  
462 6.2 sputtering system.

# Supplementary Information for Investigating Metal-Organic Frameworks Anchors for Giant Unilamellar Vesicle Immobilization

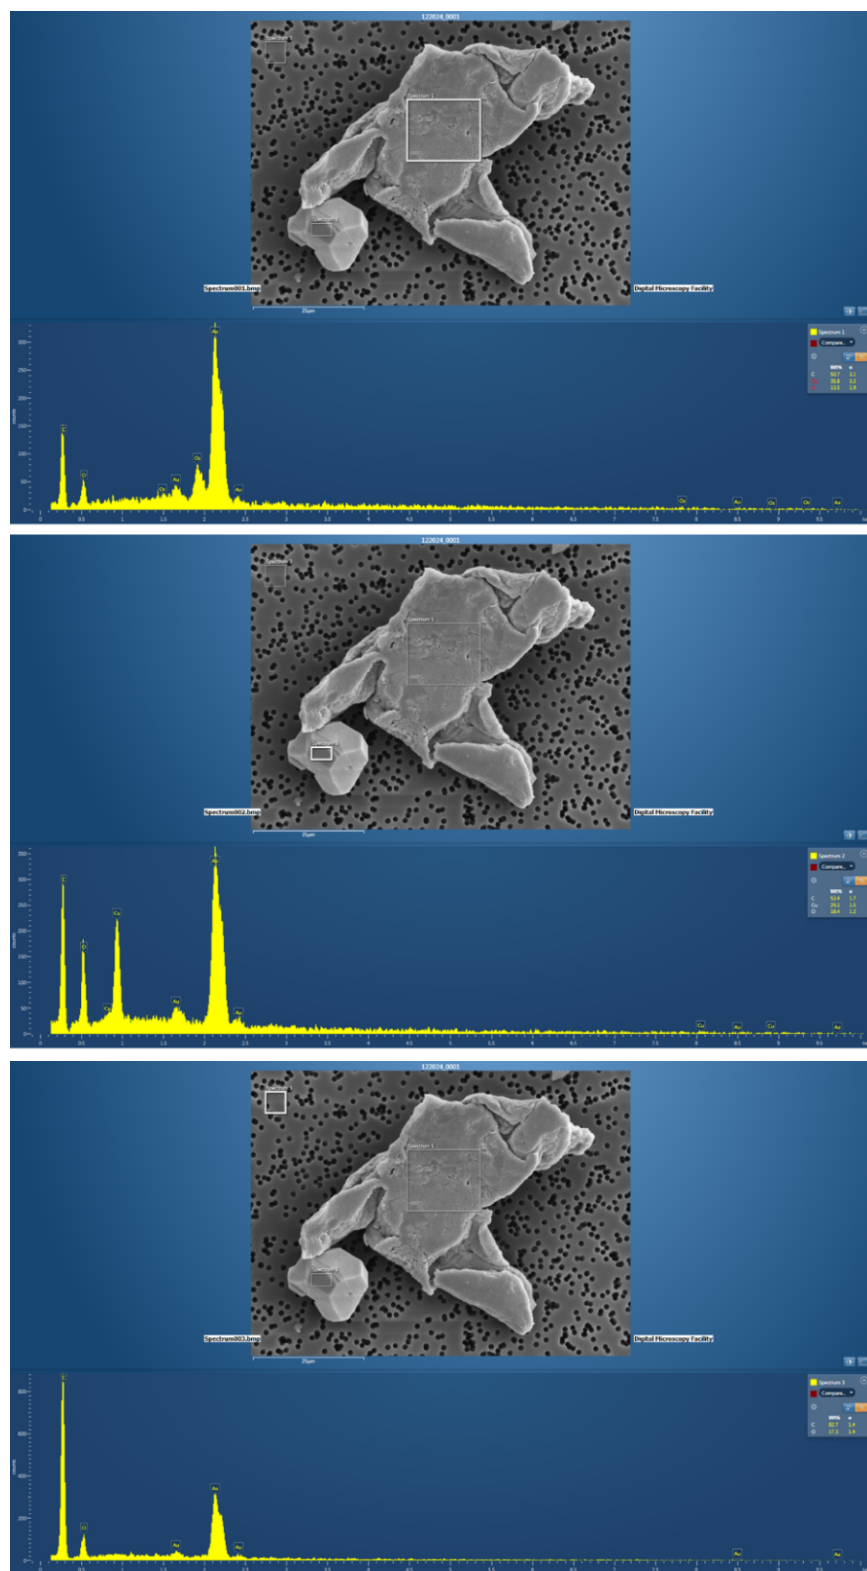

463

464 **Figure S36. GU@HKUST-1 EDS analysis**

# Supplementary Information for Investigating Metal-Organic Frameworks Anchors for Giant Unilamellar Vesicle Immobilization

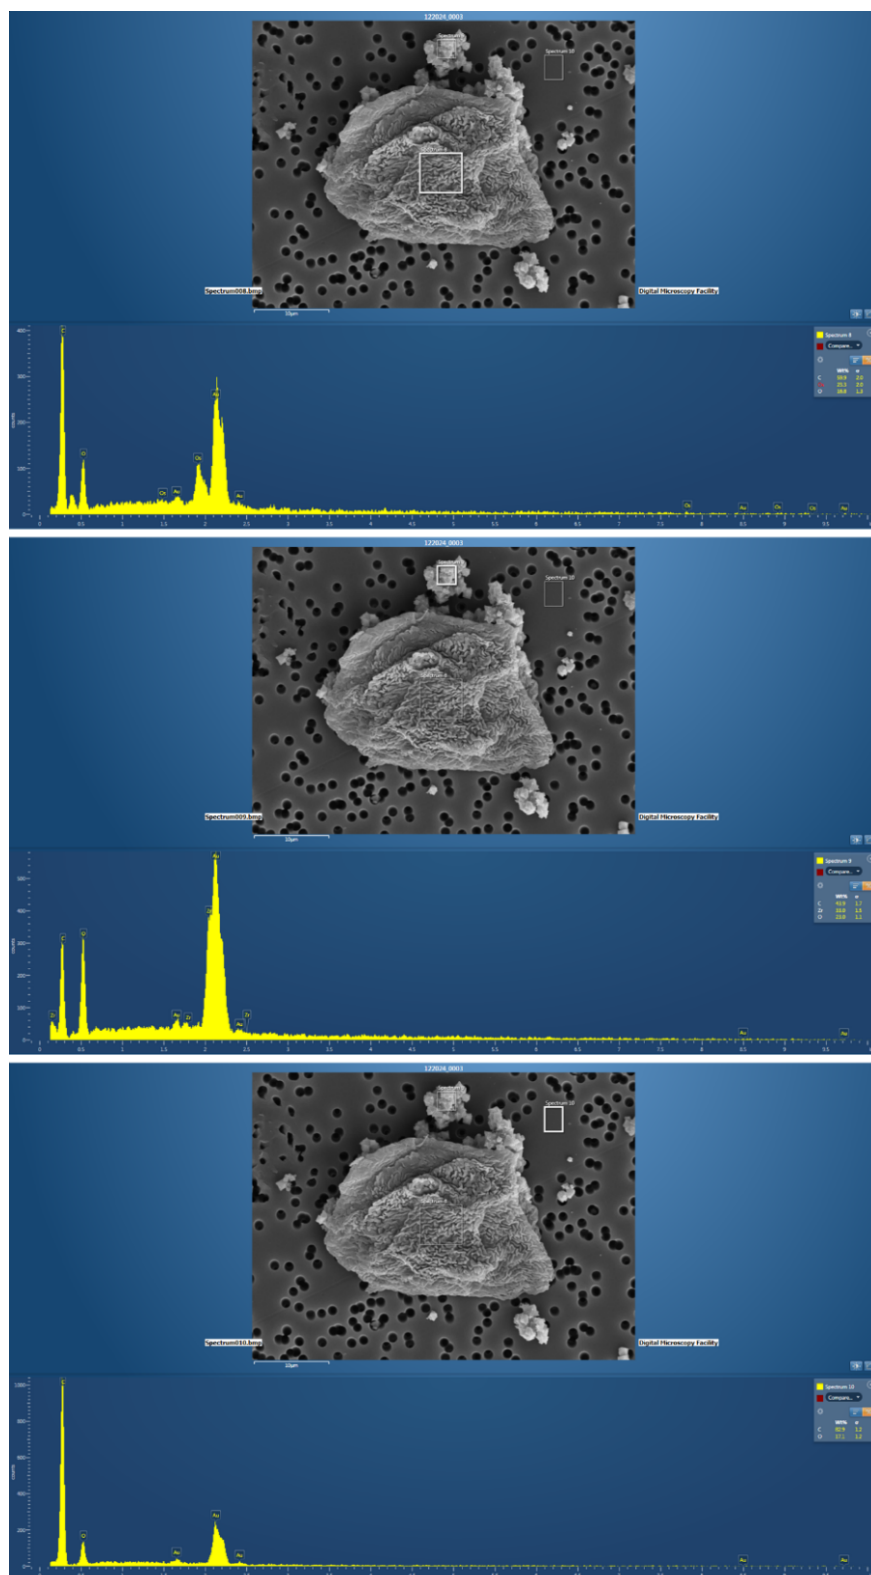

465

466 **Figure S37. GU@MOF-808 EDS analysis**



Supplementary Information for  
**Investigating Metal-Organic Frameworks Anchors for Giant Unilamellar  
Vesicle Immobilization**

467 **Atomic Force Microscopy (AFM)**

468 The AFM was utilized to investigate the interaction between GUV membrane and MOF surfaces,  
469 the results show high-resolution images of the physical interface confirming the immobilization of  
470 GUVs with MOF particles under dry-stage conditions. The droplets of the GUV@HKUST-1 MOF  
471 suspension were introduced to freshly cleaved mica sheets such that they covered the substrates,  
472 and after ~ 1 min, dried under a gentle stream of nitrogen and imaged immediately. The samples  
473 were scanned in intermittent-contact mode using a Park Systems XE-100 atomic force microscope  
474 equipped with a silicon cantilever ( $f_0 \sim 300$  kHz, Park Systems). Topographic and phase images  
475 were recorded simultaneously at a resolution of 256 x 256 pixels, at a scan rate of 1 Hz. Image  
476 processing (i.e. deglitching, cropping, and flattening) was performed using the Park Systems XEI  
477 software. AFM imaging of the GUV@HKUST-1 revealed bubble-like textures across the film  
478 when imaged immediately after drying with a gentle stream of N<sub>2</sub> gas (Figure S38a, green arrow),  
479 with heights typically at least 400 nm. Synchronous phase imaging supports the assignment of  
480 vesicles to regions of large negative phase contrast, indicating a softer material in those regions  
481 compared to the mica substrate. Often two types of features were imaged as attached to the vesicle  
482 structures: nearly flat features with strong phase contrast to the vesicle (blue arrow), and very  
483 rough and tall features (red arrow). Further imaging of the solution containing glucose and HEPES  
484 in absence of the GUV@MOF (Figure S39b) shows features mainly with low topography (i.e. 2-  
485 10 nm in height). The corresponding phase images, however, display large phase contrast between  
486 these features and the substrate. Figure S39b supports the assignment of the bubble features to  
487 vesicles given their unique height and morphology compared to the glucose and HEPES control  
488 images. These images also enable the assignment of the large features in Figure S39a to that of  
489 the “vesicle-HKUST-1 MOF” given their amorphous and pronounced topography. Overall, figure  
490 S38 demonstrates that intimate contact is made between the MOF and the giant lamellar vesicle.

491

## Supplementary Information for Investigating Metal-Organic Framework Anchors for Giant Unilamellar Vesicle Immobilization

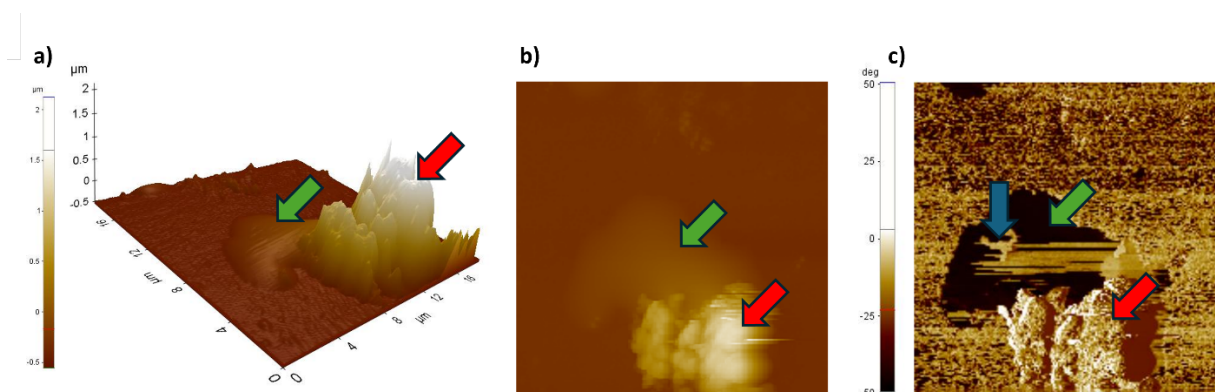

492

493 **Figure S38.** The renderings of AFM topography images a) 3D rendering b) 2D rendering and c)  
494 phase image corresponding to a GUV@HKUST-1 adduct adsorbed onto mica substrate. The  
495 arrows highlight features corresponding to a vesicle (green), MOF (red), and adsorbed crystallite,  
496 most likely corresponding to glucose.

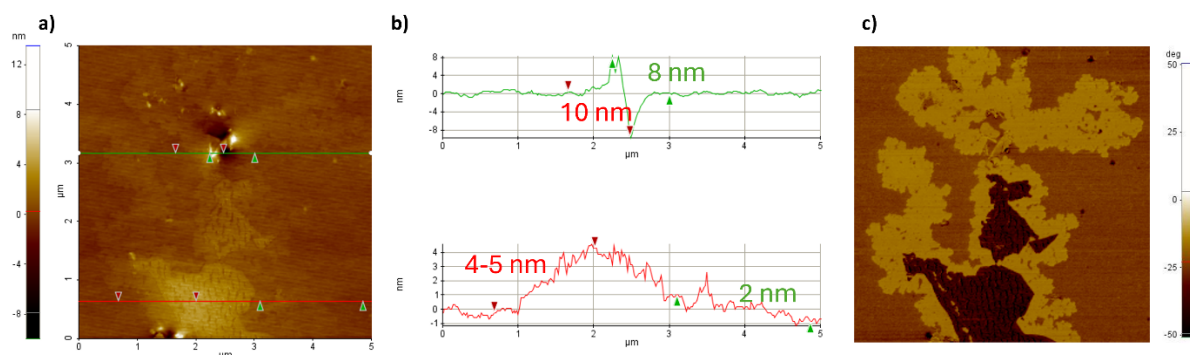

497

498 **Figure S39.** The AFM a) topography and c) phase images depicting the morphologies associated  
499 with glucose and HEPES buffer used for GUV suspension, upon drying on the mica substrate. The  
500 line scans from a) and corresponds to topographic heights, are shown in b) image.

501

502

503

Supplementary Information for  
**Investigating Metal-Organic Frameworks Anchors for Giant Unilamellar  
Vesicle Immobilization**

504 Supplementary Videos Time-lapse videos of POPC:POPG:Chol GUVs anchored by MOF particles  
505 were recorded for 5 minutes. We have provided a 30-second excerpt to demonstrate the  
506 immobilization.

507 **Supplementary Video SV1** - GUV immobilization by MIL-53(Al)

508 **Supplementary Video SV2** - GUV immobilization by MIL-100(Al)

509 **Supplementary Video SV3** - GUV immobilization by MIL-53(Fe)

510 **Supplementary Video SV4** - GUV immobilization by MIL-100(Fe)

511 **Supplementary Video SV5** - GUV immobilization by CuBDC

512 **Supplementary Video SV6** - GUV immobilization by HKUST-1

513 **Supplementary Video SV7** - GUV immobilization by UiO-66

514 **Supplementary Video SV8** - GUV immobilization by MOF-808

515 **Supplementary Video SV9** - GUV immobilization by MOF-177

516 **Supplementary Video SV10** - GUV immobilization by CaBDC

517 **Supplementary Video SV11** - GUV@MIL-100(Fe) confocal z-stack

518 **Supplementary Video SV12** - GUV@HKUST-1 confocal z-stack

519 **Supplementary Video SV13** - GUV@UiO-66 confocal z-stack

520 **Supplementary Video SV14** - GUV@MOF-808 confocal z-stack

521

522

Supplementary Information for  
**Investigating Metal-Organic Frameworks Anchors for Giant Unilamellar  
Vesicle Immobilization**

523 **References**

- 524 (1) Jennings, C. S.; Rossman, J. S.; Hourihan, B. A.; Marshall, R. J.; Forgan, R. S.; Blight, B. A.  
525 Immobilising Giant Unilamellar Vesicles with Zirconium Metal–Organic Framework  
526 Anchors. *Soft Matter* **2021**, *17* (8), 2024–2027.
- 527 (2) Ashling, C. W.; Johnstone, D. N.; Widmer, R. N.; Hou, J.; Collins, S. M.; Sapnik, A. F.;  
528 Bumstead, A. M.; Midgley, P. A.; Chater, P. A.; Keen, D. A.; Bennett, T. D. Synthesis and  
529 Properties of a Compositional Series of MIL-53(Al) Metal–Organic Framework Crystal-  
530 Glass Composites. *J. Am. Chem. Soc.* **2019**, *141* (39), 15641–15648.  
531 <https://doi.org/10.1021/jacs.9b07557>.
- 532 (3) Yang, J.; Wang, J.; Deng, S.; Li, J. Improved Synthesis of Trigone Trimer Cluster Metal  
533 Organic Framework MIL-100Al by a Later Entry of Methyl Groups. *Chem. Commun.* **2015**,  
534 *52* (4), 725–728. <https://doi.org/10.1039/C5CC08450D>.
- 535 (4) Saha, D.; Deng, S. Structural Stability of Metal Organic Framework MOF-177. *J. Phys.*  
536 *Chem. Lett.* **2010**, *1* (1), 73–78. <https://doi.org/10.1021/jz900028u>.
- 537 (5) Bagheri, A. R.; Ghaedi, M. Application of Cu-Based Metal-Organic Framework (Cu-BDC)  
538 as a Sorbent for Dispersive Solid-Phase Extraction of Gallic Acid from Orange Juice  
539 Samples Using HPLC-UV Method. *Arabian Journal of Chemistry* **2020**, *13* (5), 5218–5228.  
540 <https://doi.org/10.1016/j.arabjc.2020.02.020>.
- 541 (6) Chui, S. S.-Y.; Lo, S. M.-F.; Charmant, J. P. H.; Orpen, A. G.; Williams, I. D. A Chemically  
542 Functionalizable Nanoporous Material [Cu<sub>3</sub>(TMA)<sub>2</sub>(H<sub>2</sub>O)<sub>3</sub>]<sub>n</sub>. *Science* **1999**, *283* (5405),  
543 1148–1150. <https://doi.org/10.1126/science.283.5405.1148>.
- 544 (7) Simon, M. A.; Anggraeni, E.; Soetaredjo, F. E.; Santoso, S. P.; Irawaty, W.; Thanh, T. C.;  
545 Hartono, S. B.; Yuliana, M.; Ismadji, S. Hydrothermal Synthesize of HF-Free MIL-100(Fe)  
546 for Isoniazid-Drug Delivery. *Sci Rep* **2019**, *9* (1), 16907. <https://doi.org/10.1038/s41598-019-53436-3>.
- 548 (8) Katz, M. J.; Brown, Z. J.; Colón, Y. J.; Siu, P. W.; Scheidt, K. A.; Snurr, R. Q.; Hupp, J. T.;  
549 Farha, O. K. A Facile Synthesis of UiO-66, UiO-67 and Their Derivatives. *Chemical*  
550 *Communications* **2013**, *49* (82), 9449–9451.
- 551 (9) Dai, S.; Simms, C.; Dovgaliuk, I.; Patriarche, G.; Tissot, A.; Parac-Vogt, T. N.; Serre, C.  
552 Monodispersed MOF-808 Nanocrystals Synthesized via a Scalable Room-Temperature  
553 Approach for Efficient Heterogeneous Peptide Bond Hydrolysis. *Chem. Mater.* **2021**, *33*  
554 (17), 7057–7066. <https://doi.org/10.1021/acs.chemmater.1c02174>.
- 555 (10) Xiao, F.; Gao, W.; Wang, H.; Wang, Q.; Bao, S.; Xu, M. A New Calcium Metal Organic  
556 Frameworks (Ca-MOF) for Sodium Ion Batteries. *Materials Letters* **2021**, *286*, 129264.  
557 <https://doi.org/10.1016/j.matlet.2020.129264>.
- 558 (11) Yang, D.-A.; Cho, H.-Y.; Kim, J.; Yang, S.-T.; Ahn, W.-S. CO<sub>2</sub> Capture and Conversion  
559 Using Mg-MOF-74 Prepared by a Sonochemical Method. *Energy Environ. Sci.* **2012**, *5* (4),  
560 6465–6473. <https://doi.org/10.1039/C1EE02234B>.

562
